# Supplementary material for: Highly specific unnatural base pair systems as a third base pair for PCR amplification
Source: PubMed Central journal article supplement — Nucleic Acids Res. 2011 Nov 24;40(6):2793–806. doi: 10.1093/nar/gkr1068 (PMC3315302; doi:10.1093/nar/gkr1068), 2011-11-24

# Highly specific unnatural base pair system as a third base pair for PCR amplification

Rie Yamashige<sup>1</sup>, Michiko Kimoto<sup>1,2</sup>, Yusuke Takezawa<sup>1</sup>, Akira Sato<sup>1</sup>, Tsuneo Mitsu<sup>2</sup>, Shigeyuki Yokoyama<sup>1,3</sup>,  
Ichiro Hirao<sup>1,2,\*</sup>

<sup>1</sup>RIKEN Systems and Structural Biology Center (SSBC), 1-7-22 Suehiro-cho, Tsurumi-ku, Yokohama, Kanagawa 230-0045, Japan, <sup>2</sup>TagCyx Biotechnologies, 1-6-126 Suehiro-cho, Tsurumi-ku, Yokohama, Kanagawa 230-0045, Japan, and <sup>3</sup>Department of Biophysics and Biochemistry, Graduate School of Science, The University of Tokyo, 7-3-1 Hongo, Bunkyo-ku, Tokyo 113-0033, Japan.

AUTHOR EMAIL ADDRESS. [ihirao@riken.jp](mailto:ihirao@riken.jp)

## Supplementary data

### Biological experimental methods and data

1. PCR amplification of DNA fragments involving the Ds-Px pair by several DNA polymerases  
(Supplementary table 1)
2. Analysis of the retention rates of the Ds-Px pair in the PCR-amplified DNAs  
(Supplementary figures 1 and 2)
3. Sequencing analysis of the PCR products after 15 cycles of PCR by each DNA polymerase  
(Supplementary figures 3-15)

### Chemical syntheses

1. General methods and materials
2. Chemical synthesis of dPxTP
3. Chemical synthesis of NH<sub>2</sub>-C1-dPxTP
4. Chemical synthesis of Diol1-dPxTP
5. Chemical synthesis of Diol3o3-dPxTP
6. Chemical synthesis of DMP-hx-dPxTP
7. Chemical synthesis of NTP-hx-dPxTP
8. Chemical synthesis of BPh-hx-dPxTP
9. Chemical synthesis of HBP-hx-dPxTP

### **NMR and MS spectra of compounds.**

- F1. <sup>1</sup>H NMR (300 MHz, D<sub>2</sub>O) spectrum of dP<sub>x</sub>TP.
- F2. <sup>31</sup>P NMR (121 MHz, D<sub>2</sub>O) spectrum of dP<sub>x</sub>TP.
- F3. ESI-MS spectrum of dP<sub>x</sub>TP.
- F4. <sup>1</sup>H NMR (300 MHz, D<sub>2</sub>O) spectrum of NH<sub>2</sub>-C1-dP<sub>x</sub>TP.
- F5. <sup>31</sup>P NMR (121 MHz, D<sub>2</sub>O) spectrum of NH<sub>2</sub>-C1-dP<sub>x</sub>TP.
- F6. ESI-MS spectrum of NH<sub>2</sub>-C1-dP<sub>x</sub>TP.
- F7. <sup>1</sup>H NMR (300 MHz, D<sub>2</sub>O) spectrum of Diol1-dP<sub>x</sub>TP.
- F8. <sup>31</sup>P NMR (121 MHz, D<sub>2</sub>O) spectrum of Diol1-dP<sub>x</sub>TP.
- F9. ESI-MS spectrum of Diol1-dP<sub>x</sub>TP.
- F10. <sup>1</sup>H NMR (300 MHz, D<sub>2</sub>O) spectrum of Diol3o3-dP<sub>x</sub>TP.
- F11. <sup>31</sup>P NMR (121 MHz, D<sub>2</sub>O) spectrum of Diol3o3-dP<sub>x</sub>TP.
- F12. ESI-MS spectrum of Diol3o3-dP<sub>x</sub>TP.
- F13. <sup>1</sup>H NMR (300 MHz, D<sub>2</sub>O) spectrum of DMP-hx-dP<sub>x</sub>TP.
- F14. <sup>31</sup>P NMR (121 MHz, D<sub>2</sub>O) spectrum of DMP-hx-dP<sub>x</sub>TP.
- F15. ESI-MS spectrum of DMP-hx-dP<sub>x</sub>TP.
- F16. <sup>1</sup>H NMR (300 MHz, D<sub>2</sub>O) spectrum of NTP-hx-dP<sub>x</sub>TP.
- F17. <sup>31</sup>P NMR (121 MHz, D<sub>2</sub>O) spectrum of NTP-hx-dP<sub>x</sub>TP.
- F18. ESI-MS spectrum of NTP-hx-dP<sub>x</sub>TP.
- F19. <sup>1</sup>H NMR (300 MHz, D<sub>2</sub>O) spectrum of BPh-hx-dP<sub>x</sub>TP.
- F20. <sup>31</sup>P NMR (121 MHz, D<sub>2</sub>O) spectrum of BPh-hx-dP<sub>x</sub>TP.
- F21. ESI-MS spectrum of BPh-hx-dP<sub>x</sub>TP.
- F22. <sup>1</sup>H NMR (300 MHz, D<sub>2</sub>O) spectrum of HBP-hx-dP<sub>x</sub>TP.
- F23. <sup>31</sup>P NMR (121 MHz, D<sub>2</sub>O) spectrum of HBP-hx-dP<sub>x</sub>TP.
- F24. ESI-MS spectrum of HBP-hx-dP<sub>x</sub>TP.

## Biological experimental methods and data.

### 1. PCR amplification of DNA fragments involving the Ds-Px pair by several DNA polymerases

Supplementary table 1. Amplification folds and retention rates of the Ds-Px pair after 15 cycles of PCR in different template sequence contexts by several DNA polymerases, using dDsTP and NH<sub>2</sub>-hx-dPxTP.

| DNA polymerase | 3'→5' exonuclease activity | Natural base substrates | dDsTP and NH <sub>2</sub> -hx-dPxTP (μM) | DNA template | Amplification fold | Retention rate of Ds-Px <sup>a</sup> (%) |
|----------------|----------------------------|-------------------------|------------------------------------------|--------------|--------------------|------------------------------------------|
| Deep Vent      | +                          | 300                     | 50                                       | Ds-temp 1    | 939                | >97 <sup>b</sup>                         |
|                |                            |                         |                                          | Ds-temp 2    | 807                | >97                                      |
|                |                            |                         |                                          | Ds-temp 3    | 814                | >97                                      |
|                |                            |                         |                                          | Ds-temp 4    | 524                | >97                                      |
|                |                            |                         |                                          | Cont-temp    | 1266               | -                                        |
|                |                            | 500                     | 50                                       | Ds-temp 1    | 945                | >97                                      |
|                |                            |                         |                                          | Ds-temp 2    | 814                | >97                                      |
|                |                            |                         |                                          | Ds-temp 3    | 968                | >97                                      |
|                |                            |                         |                                          | Ds-temp 4    | 766                | 96 ±1                                    |
|                |                            |                         |                                          | Cont-temp    | 1251               | -                                        |
| Deep Vent      | -                          | 300                     | 50                                       | Ds-temp 1    | 424                | >97                                      |
|                |                            |                         |                                          | Ds-temp 2    | 433                | >97                                      |
|                |                            |                         |                                          | Cont-temp    | 665                | -                                        |
| AccuPrime Pfx  | mix                        | 300                     | 50                                       | Ds-temp 1    | 1270               | >97                                      |
|                |                            |                         |                                          | Ds-temp 2    | 1314               | >97                                      |
|                |                            |                         |                                          | Ds-temp 3    | 1244               | >97                                      |
|                |                            |                         |                                          | Ds-temp 4    | 531                | 92 ±1                                    |
|                |                            |                         |                                          | Cont-temp    | 1536               | -                                        |
|                |                            | 400                     | 50                                       | Ds-temp 1    | 1774               | >97                                      |
|                |                            |                         |                                          | Ds-temp 2    | 1735               | >97                                      |
|                |                            |                         |                                          | Ds-temp 3    | 1841               | >97                                      |
|                |                            |                         |                                          | Ds-temp 4    | 1503               | 93 ±2                                    |
|                |                            |                         |                                          | Cont-temp    | 1955               | -                                        |
| Pfx50          | +                          | 300                     | 50                                       | Ds-temp 1    | 1156               | >97                                      |
|                |                            |                         |                                          | Ds-temp 2    | 1091               | >97                                      |
|                |                            |                         |                                          | Ds-temp 3    | 1005               | >97                                      |
|                |                            |                         |                                          | Ds-temp 4    | 381                | 94 ±1                                    |
|                |                            |                         |                                          | Cont-temp    | 1599               | -                                        |
| Phusion HF     | +                          | 300                     | 50                                       | Ds-temp 1    | 402                | >97                                      |
|                |                            |                         |                                          | Ds-temp 2    | 174                | >97                                      |
|                |                            |                         |                                          | Ds-temp 3    | 240                | >97                                      |
|                |                            |                         |                                          | Ds-temp 4    | 103                | 94 ±1                                    |
|                |                            |                         |                                          | Cont-temp    | 1011               | -                                        |
| Pfu            | +                          | 300                     | 50                                       | Ds-temp 1    | 830                | >97                                      |
|                |                            |                         |                                          | Ds-temp 2    | 697                | >97                                      |
|                |                            |                         |                                          | Ds-temp 3    | 662                | >97                                      |
|                |                            |                         |                                          | Ds-temp 4    | 221                | 86 ±2                                    |

|                 |     |     |    |                  |      |        |
|-----------------|-----|-----|----|------------------|------|--------|
|                 |     |     |    | Cont-temp        | 1113 | -      |
| Pwo SY          | +   | 300 | 50 | <b>Ds-temp 1</b> | 939  | >97    |
|                 |     |     |    | <b>Ds-temp 2</b> | 365  | >97    |
|                 |     |     |    | <b>Ds-temp 3</b> | 544  | >97    |
|                 |     |     |    | <b>Ds-temp 4</b> | 62   | 75 ±11 |
|                 |     |     |    | Cont-temp        | 1403 | -      |
| Vent            | +   | 300 | 50 | <b>Ds-temp 1</b> | 764  | 96 ±1  |
|                 |     |     |    | <b>Ds-temp 2</b> | 704  | >97    |
|                 |     |     |    | Cont-temp        | 898  | -      |
| N9°             | (-) | 300 | 50 | <b>Ds-temp 1</b> | 109  | 96 ±2  |
|                 |     |     |    | <b>Ds-temp 2</b> | 129  | >97    |
|                 |     |     |    | Cont-temp        | 133  | -      |
| TITANIUM<br>Taq | -   | 300 | 50 | <b>Ds-temp 1</b> | 485  | 65 ±2  |
|                 |     |     |    | <b>Ds-temp 2</b> | 476  | 53 ±2  |
|                 |     |     |    | Cont-temp        | 1039 | -      |
| Taq             | -   | 300 | 50 | <b>Ds-temp 1</b> | 146  | 39 ±5  |
|                 |     |     |    | <b>Ds-temp 2</b> | 155  | 37 ±4  |
|                 |     |     |    | Cont-temp        | 216  | -      |

<sup>a</sup>Retention rates (%) of the **Ds–Px** pair in the amplified products after 15 cycles of PCR.

<sup>b</sup>>97% is the maximum detection limit by the assessment.

## 2. Analysis of the retention rates of the **Ds**–**Px** pair in the PCR-amplified DNAs

We calculated the retention rates of the **Ds**–**Px** pair in the amplified DNA fragments, by sequencing the DNA fragments in the presence of dd**Pa**'TP and comparing the sequencing peak patterns with those of authentic DNA samples (Figures S1 and S2). For authentic sequencing data, we used a DNA fragment containing one **Ds** base (75-mer, **Ds**-temp 0), mixed with the DNA fragment comprising natural bases only (Cont-temp 0, the **Ds** base in **Ds**-temp 0 was replaced by A), at ratios of 100:0, 99:1, 97:3, 95:5, 90:10, 80:20, and 70:30, as the template. The sequence data were analyzed by setting the start and stop points for the 55-nucleotide region, corresponding to the sequence, 5'-GATAATACGACTCACTATAGGGGCAANGGGCCGTCATAGCTGTTTTCCTGTGTGAAA-3' (N = the unnatural base position or T) (Figure S1). The sequencing peak heights of the G20, G32, T33, G38 and T42 positions (bold and underlined) were then determined with Sequence Scanner Version 1.0 (Applied Biosystems). An example is shown in panel A of Figure S2. The peak heights of the G32, T33, G38 and T42 positions, located after the unnatural base position, were normalized to that of the G20 position, located in the primer binding region for PCR. The normalized peak heights were plotted over the percentage of Cont-temp 0 in the DNA mixtures (corresponding to the pseudo percentage of the replacement of the **Ds** base with a natural base after PCR amplification), and the standard curves for the four nucleotide positions were obtained by fitting with a linear equation with correlation coefficients greater than 0.98 (Figure S2, B). We calculated the percentage of the replacement of the **Ds** base with a natural base, from the four standard curves and the normalized peak heights of each nucleotide position in the sequence peak patterns of the PCR-amplified DNA fragments. The retention rate of the **Ds**–**Px** pair was determined by averaging the four values, obtained from each standard curve. The limit of detection is 3% replacement of the **Ds** base with a natural base.

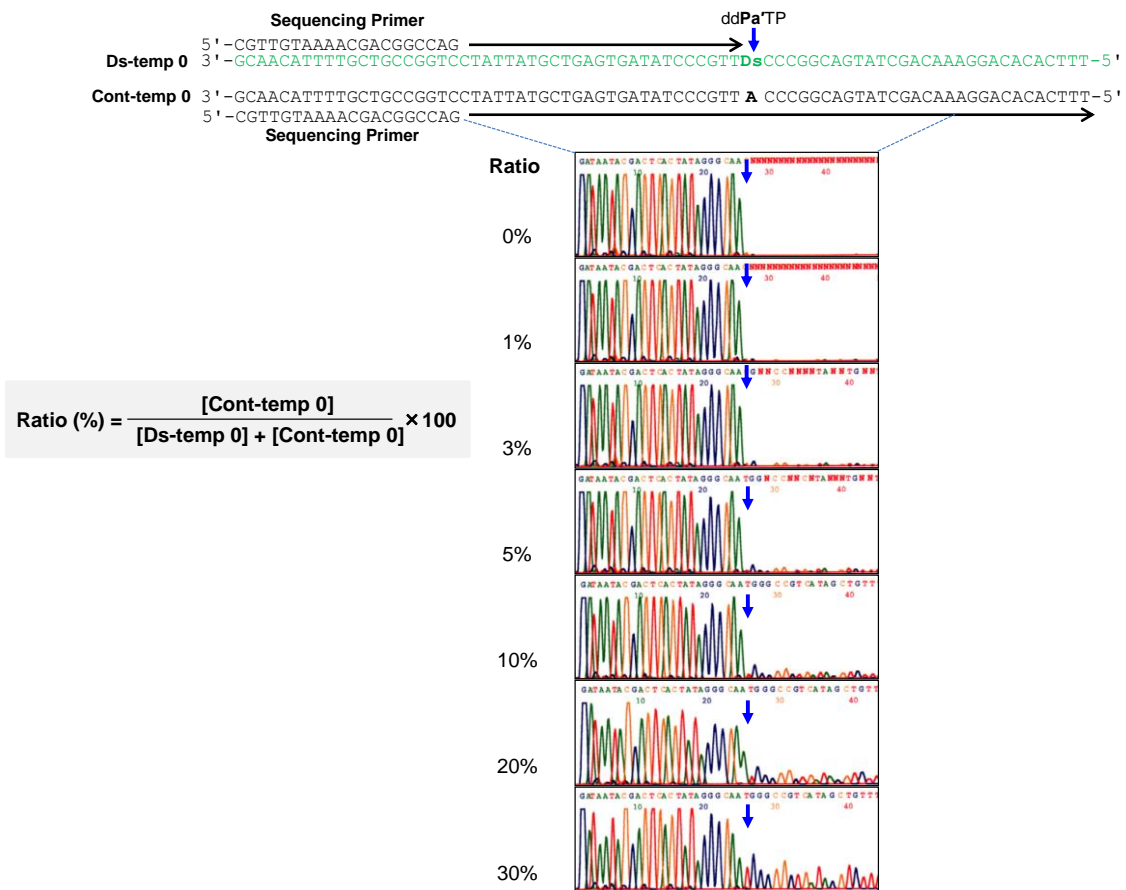

**Supplementary figure 1. Dye-terminator sequencing, in the presence of ddPa'TP, of the mixture of Ds-temp 0 (75-mer) and Cont-temp 0 (75-mer), containing 0–30% Cont-temp 0. The blue arrow indicates the unnatural base position in Ds-temp 0.**

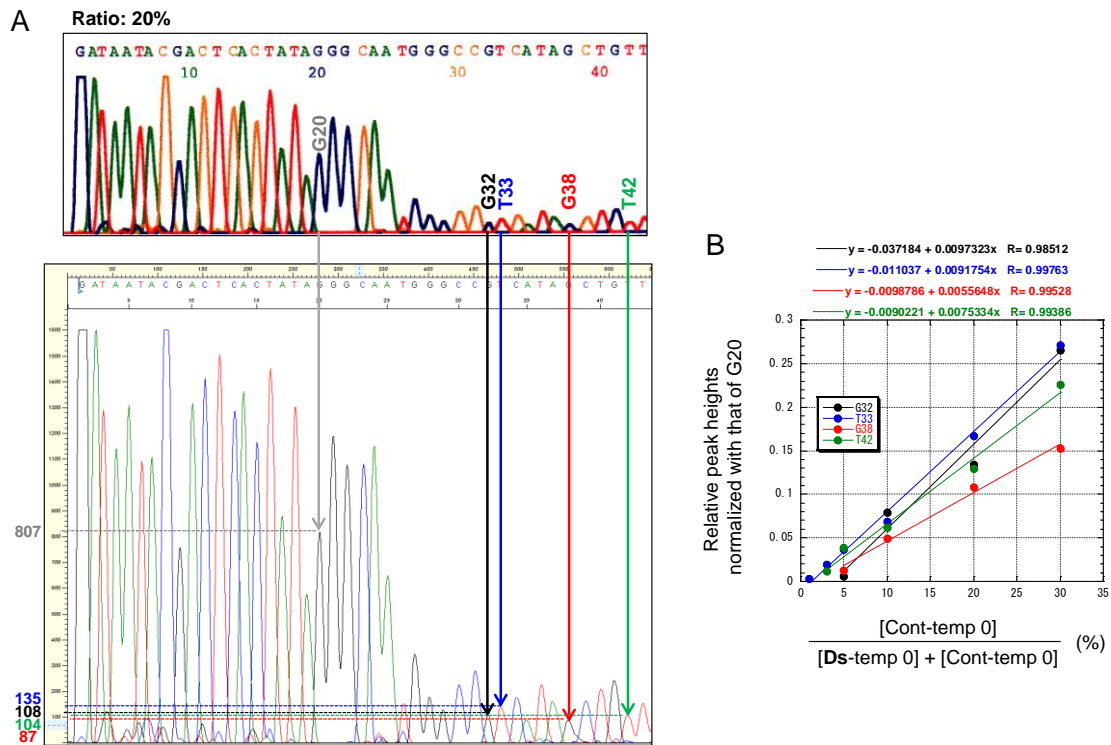

Supplementary figure 2. Representative data of peak height quantification at five nucleotide positions in a sequencing pattern (20% ratio in Figure S1) and standard curves used for the calculation of the retention rate of the Ds–Px pair. The sequencing peak heights at the G20 position and at the four-nucleotide positions, G32, T33, G38, and T42, in the sequencing data, obtained with the Applied Biosystems PRISM sequencing analysis software v3.2, were quantified by using an Applied Biosystems Sequence Scanner v1.0. The peak heights at the four nucleotide positions were divided by that at G20 to normalize each peak height, since the peak heights varied due to the different amounts of samples loaded on the sequencing gel.

### 3. Sequencing analysis of the PCR products after 15 cycles of PCR by each DNA polymerase

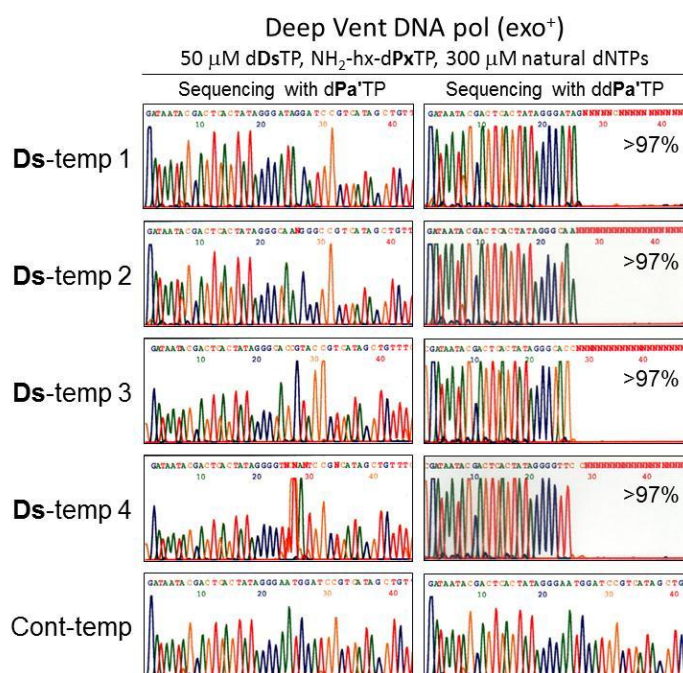

Supplementary figure 3. Sequencing analysis of the PCR products after 15 cycles of PCR by Deep Vent DNA pol (exo<sup>+</sup>) (0.5 unit) in a buffer containing 2 mM MgSO<sub>4</sub> with 50 μM dDsTP, NH<sub>2</sub>-hx-dPxTP and 300 μM natural dNTPs.

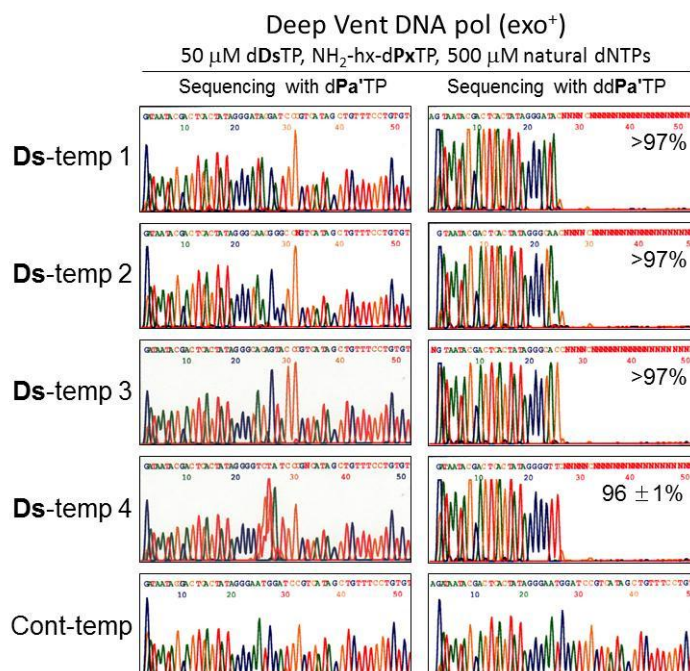

Supplementary figure 4. Sequencing analysis of the PCR products after 15 cycles of PCR by Deep Vent DNA pol (exo<sup>+</sup>) (0.5 unit) in a buffer containing 4 mM MgSO<sub>4</sub> with 50 μM dDsTP, NH<sub>2</sub>-hx-dPxTP and 500 μM natural dNTPs.



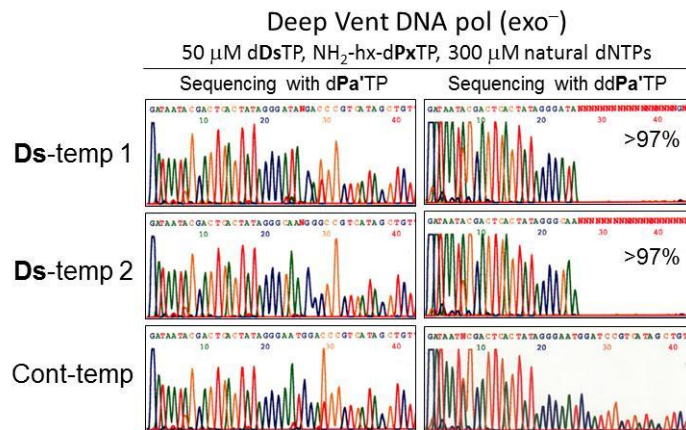

**Supplementary figure 5. Sequencing analysis of the PCR products after 15 cycles of PCR by Deep Vent DNA pol (exo<sup>-</sup>) (0.5 unit) with 50 μM dDsTP, NH<sub>2</sub>-hx-dPxTP and 300 μM natural dNTPs.**

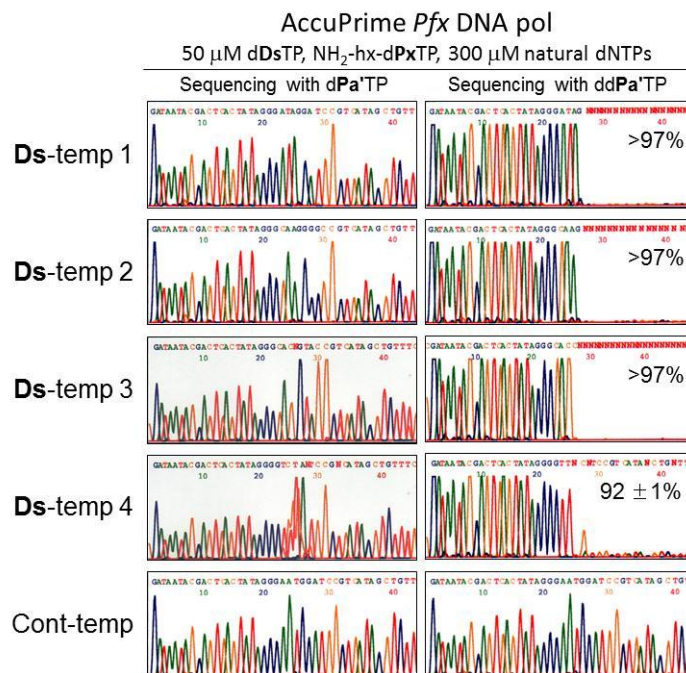

**Supplementary figure 6. Sequencing analysis of the PCR products after 15 cycles of PCR by AccuPrime *Pfx* DNA pol (1.25 units) in a buffer containing 1 mM MgSO<sub>4</sub> with 50 μM dDsTP, NH<sub>2</sub>-hx-dPxTP and 300 μM natural dNTPs.**

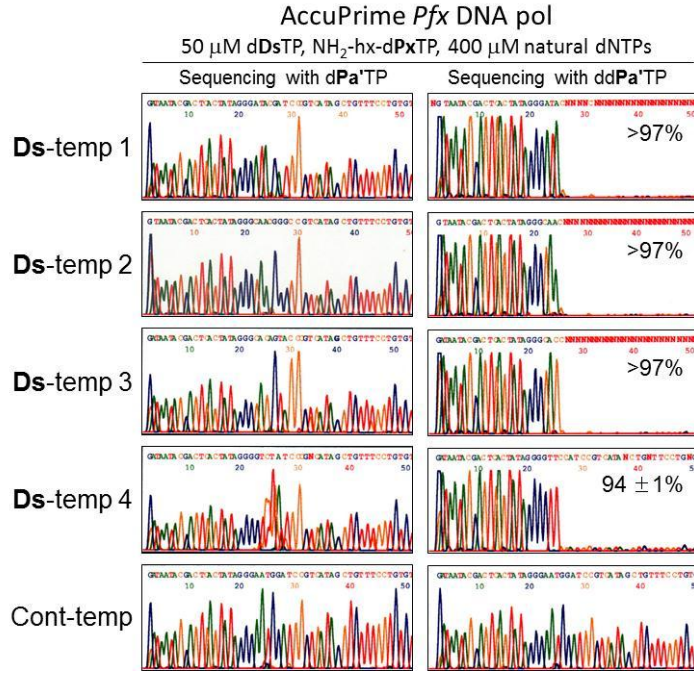

Supplementary figure 7. Sequencing analysis of the PCR products after 15 cycles of PCR by AccuPrime *Pfx* DNA pol (1.25 units) in a buffer containing 1.5 mM MgSO<sub>4</sub> with 50  $\mu$ M dDsTP, NH<sub>2</sub>-hx-dPxTP and 400  $\mu$ M natural dNTPs.

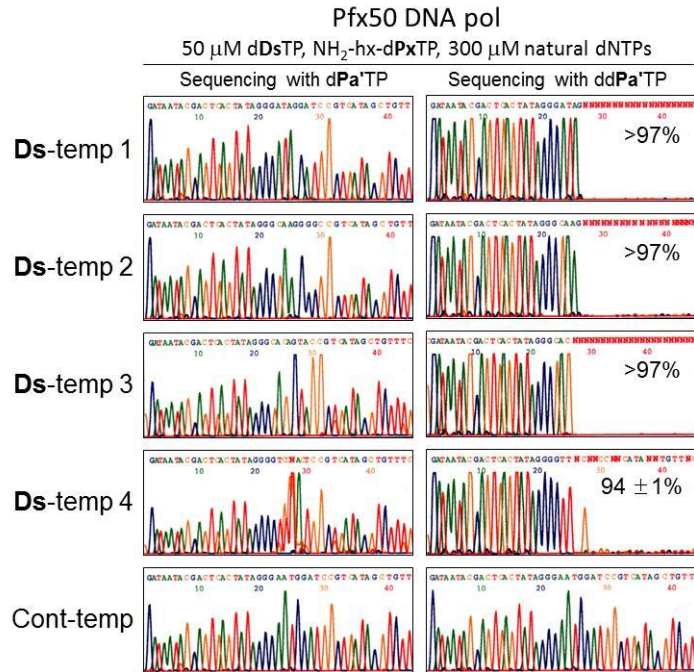

Supplementary figure 8. Sequencing analysis of the PCR products after 15 cycles of PCR by Pfx50 DNA pol (2.5 units) with 50  $\mu$ M dDsTP, NH<sub>2</sub>-hx-dPxTP and 300  $\mu$ M natural dNTPs.

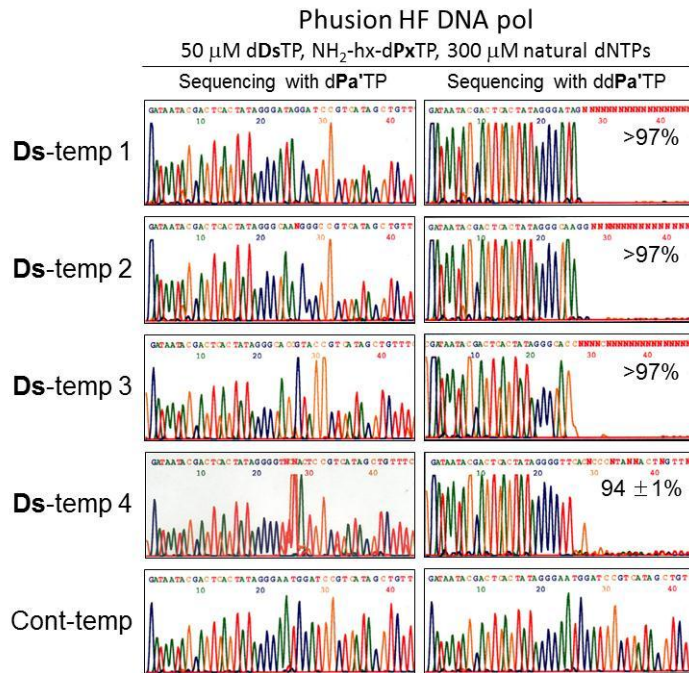

**Supplementary figure 9. Sequencing analysis of the PCR products after 15 cycles of PCR by Phusion HF DNA pol (0.5 unit) with 50  $\mu$ M dDsTP, NH<sub>2</sub>-hx-dPxTP and 300  $\mu$ M natural dNTPs.**

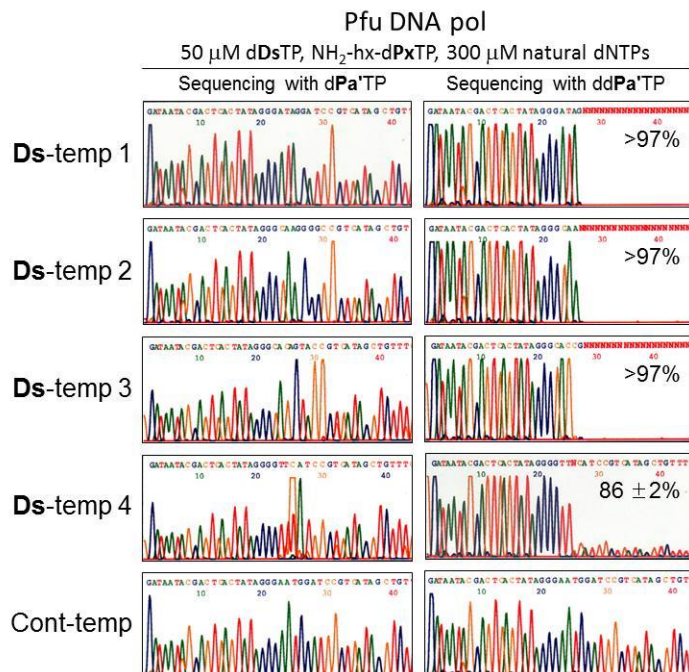

**Supplementary figure 10. Sequencing analysis of the PCR products after 15 cycles of PCR by Pfu DNA pol (1.25 units) with 50  $\mu$ M dDsTP, NH<sub>2</sub>-hx-dPxTP and 300  $\mu$ M natural dNTPs.**

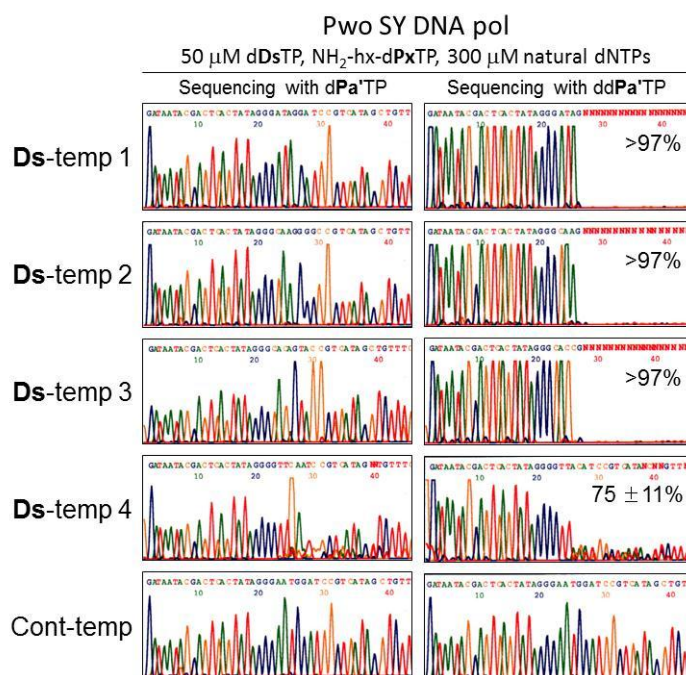

**Supplementary figure 11. Sequencing analysis of the PCR products after 15 cycles of PCR by Pwo SY DNA pol (1.25 units) with 50  $\mu$ M dDsTP, NH<sub>2</sub>-hx-dPxTP and 300  $\mu$ M natural dNTPs.**

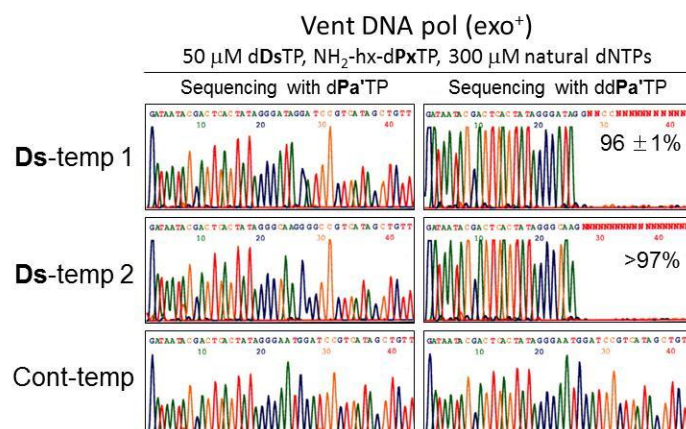

**Supplementary figure 12. Sequencing analysis of the PCR products after 15 cycles of PCR by Vent DNA pol (exo<sup>+</sup>) (0.5 unit) with 50  $\mu$ M dDsTP, NH<sub>2</sub>-hx-dPxTP and 300  $\mu$ M natural dNTPs.**

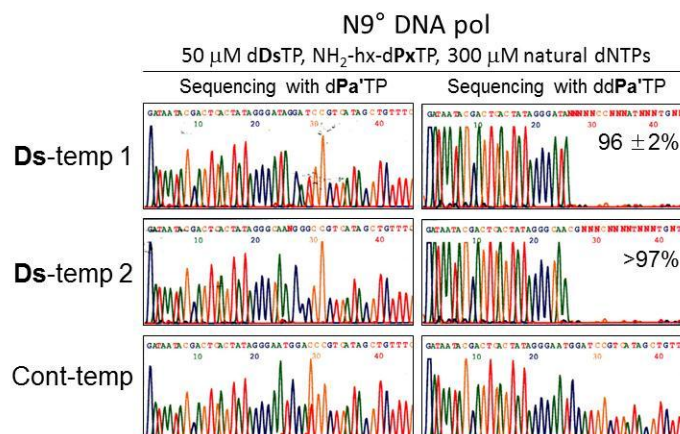

**Supplementary figure 13. Sequencing analysis of the PCR products after 15 cycles of PCR by N9° DNA pol (exo<sup>+</sup>) (0.5 unit) with 50  $\mu$ M dDsTP, NH<sub>2</sub>-hx-dPxTP and 300  $\mu$ M natural dNTPs.**

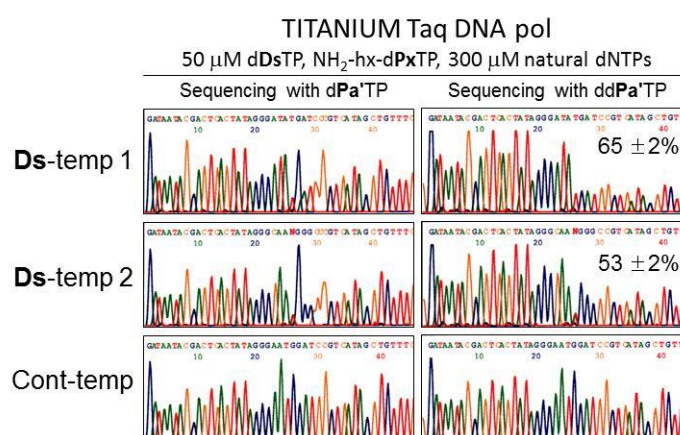

**Supplementary figure 14. Sequencing analysis of the PCR products after 15 cycles of PCR by TITANIUM Taq DNA pol (1 $\times$ ) with 50  $\mu$ M dDsTP, NH<sub>2</sub>-hx-dPxTP and 300  $\mu$ M natural dNTPs.**

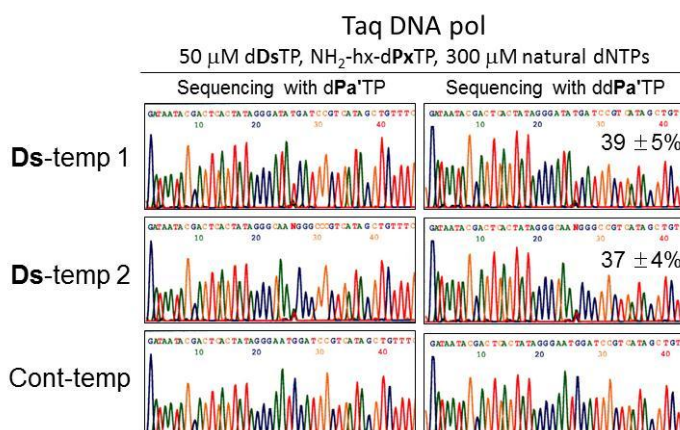

**Supplementary figure 15. Sequencing analysis of the PCR products after 15 cycles of PCR by Taq DNA pol (0.5 unit) with 50  $\mu$ M dDsTP, NH<sub>2</sub>-hx-dPxTP and 300  $\mu$ M natural dNTPs.**

## Chemical synthesis

### 1. General methods and materials

Reagents and solvents were purchased from standard suppliers and used without further purification. Reactions were monitored by thin-layer chromatography (TLC), using 0.25 mm silica gel 60 plates impregnated with 254 nm fluorescent indicator (Merck).  $^1\text{H}$  NMR,  $^{13}\text{C}$  NMR, and  $^{31}\text{P}$  NMR spectra were recorded on a Bruker (300-AVM) magnetic resonance spectrometer. Nucleoside purification was performed on a Gilson HPLC system with a preparative C18 column (Waters  $\mu$ -BONDASPHERE, 150  $\times$  19 mm). The triphosphate derivatives were purified with a DEAE-Sephadex A-25 column (300  $\times$  15 mm) and C1, C8, and C18 columns (CAPCELL PAK, 250  $\times$  4.6 mm, SHISEIDO). High resolution mass spectra (HRMS) and electrospray ionization mass spectra (ESI-MS) were recorded on a JEOL JM 700 or GC mate mass spectrometer and a Waters micromass ZMD 4000 equipped with a Waters 2690 LC system or a Waters UPLC-MS (H class) system, respectively.

### 2. Chemical synthesis of dPxTP

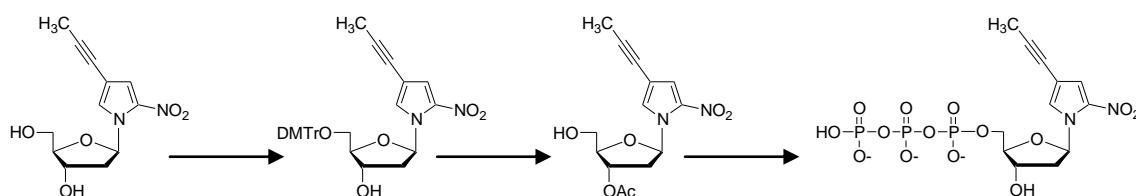

Reagents and abbreviations: (a) 4,4'-dimethoxytrityl chloride, pyridine (b) acetic anhydride, pyridine, then dichloroacetic acid, dichloromethane, 76% (c) 2-chloro-4H-1,3,2-benzodioxaphosphorin-4-one, dioxane, pyridine, tri-*n*-butylamine, bis(tributylammonium)pyrophosphate,  $\text{I}_2$ /pyridine, water,  $\text{NH}_4\text{OH}$ , 31%. Ac: acetyl.

**1-(2-Deoxy-3-O-acetyl- $\beta$ -D-ribofuranosyl)-4-propynyl-2-nitropyrrole.** 1-(2-Deoxy- $\beta$ -D-ribofuranosyl)-4-propynyl-2-nitropyrrole (200 mg, 0.75 mmol) was coevaporated to dryness with pyridine (three times). To the residue in pyridine (7.5 ml) was added 4, 4'-dimethoxytrityl chloride (280 mg, 0.83 mmol). The reaction mixture was stirred at room temperature for 1 h. The mixture was poured into 5% aqueous  $\text{NaHCO}_3$  and extracted with ethyl acetate. The organic phase was washed with water and

saturated aqueous NaCl, dried with Na<sub>2</sub>SO<sub>4</sub>, and evaporated *in vacuo*. The residue was subjected to silica gel column chromatography, using 0.5% methanol in CH<sub>2</sub>Cl<sub>2</sub> as an eluent, to afford 365 mg of 1-(2-deoxy-5-*O*-(4,4'-dimethoxytrityl)-β-D-ribofuranosyl)-4-propynyl-2-nitropyrrole in 86% yield.

1-(2-Deoxy-5-*O*-(4,4'-dimethoxytrityl)-β-D-ribofuranosyl)-4-propynyl-2-nitropyrrole (160 mg, 0.28 mmol) was coevaporated to dryness with pyridine three times. To the residue in pyridine (2.8 ml), acetic anhydride (53 μl, 0.56 mmol) was added. The reaction mixture was stirred at room temperature for 12 h and was extracted by ethyl acetate and 5% aqueous NaHCO<sub>3</sub>. The organic phase was dried with Na<sub>2</sub>SO<sub>4</sub> and evaporated *in vacuo*. The residue was coevaporated to dryness with toluene. To the residue in CH<sub>2</sub>Cl<sub>2</sub> (28 ml) was added dichloroacetic acid (280 μl) at 0°C. The reaction mixture was stirred at 0°C for 15 min. To the reaction mixture was added 5% aqueous NaHCO<sub>3</sub>, and the organic phase was washed with 5% NaHCO<sub>3</sub> and saturated NaCl. After drying over Na<sub>2</sub>SO<sub>4</sub>, the solvent was evaporated *in vacuo*. The residue was subjected to silica gel column chromatography to afford 78 mg (89%) of 1-(2-deoxy-3-*O*-acetyl-β-D-ribofuranosyl)-4-propynyl-2-nitropyrrole. <sup>1</sup>H NMR (300 MHz, DMSO-*d*<sub>6</sub>) δ 7.90 (d, 1H, *J* = 2.1 Hz), 7.30 (d, 1H, *J* = 2.1 Hz), 6.60 (t, 1H, *J* = 6.4 Hz), 5.22 (m, 2H), 4.13 (m, 1H), 3.65 (m, 2H), 2.62 (ddd, 1H, *J* = 3.1, 6.1, 14.3 Hz), 2.43 (m, 1H), 2.08 (s, 3H), 2.00 (s, 3H). HRMS (FAB, 3-NBA matrix) for C<sub>14</sub>H<sub>17</sub>N<sub>2</sub>O<sub>6</sub> (M+H)<sup>+</sup> calcd 309.1087, found 309.1066.

**1-(2-Deoxy-β-D-ribofuranosyl)-4-propynyl-2-nitropyrrole 5'-triphosphate (dPxTP).**

1-(2-Deoxy-3-*O*-acetyl-β-D-ribofuranosyl)-4-propynyl-2-nitropyrrole (31 mg, 0.1 mmol) was coevaporated with pyridine to dryness. The residue was dissolved in pyridine (100 μl) and dioxane (300 μl). A 1 M solution of 2-chloro-1,3,2-benzodioxaphosphorin-4-one in dioxane (110 μl, 0.11 mmol) was added. After 10 min, tri-*n*-butylamine (100 μl) and 0.5 M bis(tributylammonium)pyrophosphate in DMF (300 μl, 0.15 mmol) were added to the reaction mixture, which was stirred at room temperature for 10 min. A solution of 1% iodine in pyridine/water (98:2, v/v, 2.0 ml) was added. After 15 min, a 5% aqueous solution of NaHSO<sub>3</sub> (150 μl), followed by water (5 ml) was added to the reaction mixture, which was stirred at room temperature for 30 min, and then 28% NH<sub>4</sub>OH (20 ml) was added.

Ammonolysis was performed at room temperature for 2 h. After the reaction mixture was concentrated *in vacuo*, the product was purified by DEAE Sephadex (A-25) column chromatography (eluted by a gradient of 50 mM to 1.0 M TEAB), and by C18-HPLC to give 1-(2-deoxy- $\beta$ -D-ribofuranosyl)-4-propynyl-2-nitropyrrole 5'-triphosphate (dP $\alpha$ TP), (31  $\mu$ mol, 31%).  $^1\text{H}$  NMR (300 MHz,  $\text{D}_2\text{O}$ ):  $\delta$  7.74 (d, 1H,  $J$  = 2.1 Hz), 7.35 (d, 1H,  $J$  = 2.1 Hz), 6.76 (t, 1H,  $J$  = 6.1 Hz), 4.63 (m, 1H), 4.24 (m, 3H), 3.21 (q, 20H,  $J$  = 7.3 Hz), 2.64 (ddt, 1H,  $J$  = 5.2, 13.9 Hz), 2.49 (ddt, 1H,  $J$  = 6.2, 14.0 Hz), 1.99 (s, 3H), 1.28 (t, 29H,  $J$  = 7.3 Hz).  $^{31}\text{P}$  NMR (121 MHz,  $\text{D}_2\text{O}$ ):  $\delta$  -10.16 (d, 1P,  $J$  = 19.8 Hz), -10.66 (d, 1P,  $J$  = 20.0 Hz), -22.58 (t, 1P,  $J$  = 20.0 Hz). Electrospray ionization-mass spectroscopy (ESI-MS) for  $\text{C}_{12}\text{H}_{17}\text{O}_{14}\text{N}_2\text{P}_3$ ; calcd, 505.18 (M-H) $^-$ ; found, 505.23 (M-H) $^-$ . UV-vis:  $\lambda_{\text{max}}$  = 373 nm ( $\epsilon$  9500) in sodium phosphate buffer (pH 7.0).



### 3. Chemical synthesis of NH<sub>2</sub>-C1-dPxTP

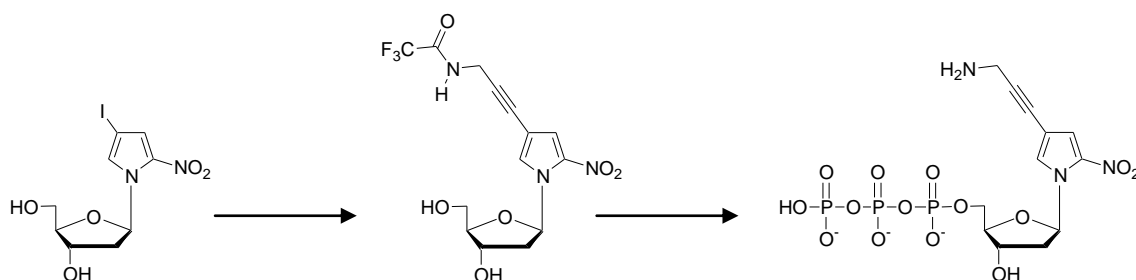

Conditions; (a) 1-(2-deoxy- $\beta$ -D-ribofuranosyl)-4-iodo-2-nitro-5H-pyrrole, TFA-NH-linker, CuI, I-dPn, Pd(PPh<sub>3</sub>)<sub>4</sub>, DMF (b) (i) POCl<sub>3</sub>, proton sponge, tri-*n*-butylamine, bis(tributylammonium)pyrophosphate (ii) 28% NH<sub>4</sub>OH

#### 1-(2-Deoxy- $\beta$ -D-ribofuranosyl)-4-[3-(trifluoroacetamido)-1-propynyl]-2-nitro-5H-pyrrole

(TFA-NH-C1-dPx). A solution of acetic anhydride (4.6 ml, 33 mmol) in CH<sub>2</sub>Cl<sub>2</sub> (30 ml) was added to a solution of propargylamine (1.0 ml, 15 mmol), CH<sub>2</sub>Cl<sub>2</sub> (30 ml), and pyridine (3.7 ml) at 0°C. The reaction mixture was stirred at room temperature for 12 h. The product was extracted with CH<sub>2</sub>Cl<sub>2</sub>/5% NaHCO<sub>3</sub>, and the organic phase was washed with 5% NaHCO<sub>3</sub>, and dried with Na<sub>2</sub>SO<sub>4</sub>. The organic phase was evaporated *in vacuo* to give the crude TFA-NH-linker as a pale yellow liquid (925 mg). A TFA-NH-linker (227 mg, 1.5 mmol) was added to a solution of 1-(2-deoxy- $\beta$ -D-ribofuranosyl)-4-iodo-2-nitro-5H-pyrrole (354 mg, 1.0 mmol), CuI (30 mg, 0.16 mmol), Pd(PPh<sub>3</sub>)<sub>4</sub> (58 mg, 0.05 mmol), and TEA (209  $\mu$ l, 1.5 mmol) in DMF (5.0 ml). The reaction mixture was stirred at room temperature for 12 h. The reaction mixture was evaporated *in vacuo*. The product was purified by chromatography on a silica gel column (eluted with 10% MeOH in CH<sub>2</sub>Cl<sub>2</sub>), and by RP-HPLC (35-50% CH<sub>3</sub>CN in H<sub>2</sub>O, 12 min) to give 330 mg (88%) of TFA-NH-C1-dPx. <sup>1</sup>H NMR (300 MHz, DMSO-*d*<sub>6</sub>)  $\delta$  10.04 (s, 1H), 7.98 (s, 1H), 7.34 (s, 1H), 6.54 (t, 1H, *J* = 5.5 Hz), 5.27 (d, 1H, *J* = 4.4 Hz), 5.10 (t, 1H, *J* = 4.9 Hz), 4.22 (bs, 3H), 3.84 (m, 1H), 3.67-3.54 (m, 2H), 2.44 (m, 1H), 2.26 (m, 1H). HRMS (FAB, 3-NBA matrix) for C<sub>14</sub>H<sub>15</sub>F<sub>3</sub>N<sub>3</sub>O<sub>6</sub>

(M+H)<sup>+</sup> calcd 378.0913, found 378.0882.

**1-(2-Deoxy-β-D-ribofuranosyl)-4-(3-amino-1-propynyl)-2-nitropyrrole 5'-triphosphate**

**(NH<sub>2</sub>-C1-dPxTP)**. TFA-NH-C1-dPx nucleoside (75 mg, 0.2 mmol) was evaporated to dryness with pyridine and toluene, and then the nucleoside and proton sponge (66 mg, 0.3 mmol) was dissolved in (CH<sub>3</sub>O)<sub>3</sub>PO (1.0 ml). POCl<sub>3</sub> (26 μl, 0.26 mmol) was added to the solution at 0 °C. After the reaction mixture was stirred at 0°C for 1 h, tri-n-butylamine (240 μl) and bis-tri-n-butylammonium pyrophosphate (2.0 ml, 0.5 M DMF solution) were added to the reaction mixture. After 30 min, 1.0ml of 0.5 M triethylamine bicarbonate and water (10 ml) were added to the reaction mixture, which was stirred at r.t. for 1 h. After lyophilization, the compound in H<sub>2</sub>O (10 ml) was treated with 28% NH<sub>4</sub>OH (40 ml) at room temperature for 1h. After the volatile components were removed, the product was purified by DEAE Sephadex A-25 column chromatography (eluted with a linear gradient of 50 mM to 1.0 M TEAB) and RP-HPLC (28% CH<sub>3</sub>CN in 100 mM TEAA, 15 min) to give 54 μmol (27%) of NH<sub>2</sub>-C1-dPxTP. <sup>1</sup>H NMR (300 MHz, D<sub>2</sub>O) δ 7.96 (d, 1H, *J* = 2.1 Hz), 7.32 (d, 1H, *J* = 2.2 Hz), 6.67 (t, 1H, *J* = 6.4 Hz), 4.55 (m, 1H), 4.24-4.12 (m, 3H), 3.91 (s, 2H), 3.11 (q, 16H, *J* = 7.3 Hz), 2.58 (dt, 1H, *J* = 6.3 and 13.8 Hz), 2.41 (ddd, 1H, *J* = 1.6, 4.8, and 14.0 Hz), 1.19 (t, 24H, *J* = 7.3 Hz). <sup>31</sup>P NMR (121 MHz, D<sub>2</sub>O) δ -8.51 (bs, 1P), -10.70 (d, 1P, *J* = 19.4 Hz), -22.19 (t, 1P, *J* = 19.9 Hz). Electrospray ionization-mass spectroscopy (ESI-MS) for C<sub>12</sub>H<sub>18</sub>O<sub>14</sub>N<sub>3</sub>P<sub>3</sub>; calcd, 520.20 (M-H)<sup>-</sup>; found, 520.24 (M-H)<sup>-</sup>. UV-vis: λ<sub>max</sub> = 364 nm (ε 10,600) in sodium phosphate buffer (pH 7.0).

#### 4. Chemical synthesis of Diol1-dPxTP

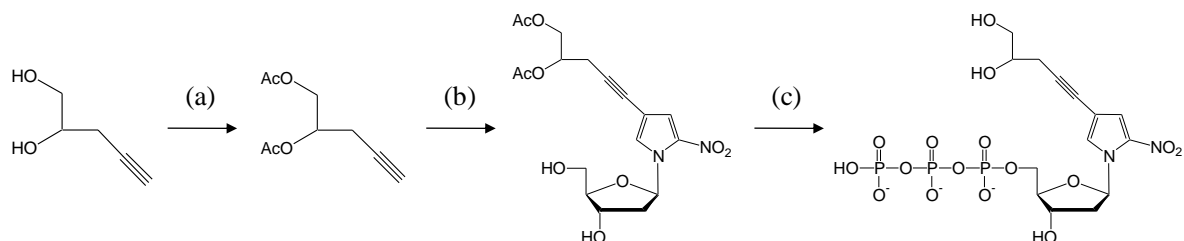

Conditions : (a)  $\text{Ac}_2\text{O}$ , pyridine, r.t., 14 h. (b) I-dPn,  $\text{Pd}(\text{PPh}_3)_4$ , CuI, TEA, DMF, r.t., 14h. (c) (i)  $\text{POCl}_3$ , proton sponge, tri-*n*-butylamine, bis-tri-*n*-butylammonium pyrophosphate (ii) 28% $\text{NH}_3\text{aq}$ , r.t., 90 min.

**4-Pentyne-1,2-diacetate (Di(OAc)1 linker).** 4-Pentyne-1,2-diol (13.5 mmol, crude) [reference *J. Org. Chem.* **2008**, 73, 5965-5976] was co-evaporated with pyridine, and acetic anhydride (4.8 ml, 50.8 mmol) was added to the crude diol in pyridine (27 ml). The reaction mixture was stirred at room temperature for 14 h. The reaction mixture was extracted by ethylacetate and a 5%  $\text{NaHCO}_3$  solution, and the organic phase was dried by  $\text{Na}_2\text{SO}_4$  and evaporated *in vacuo*. 4-Pentyne-1,2-diacetate (Di(OAc)1 linker) (800 mg, 32%) was purified by silica gel column chromatography (50 % ethylacetate in  $\text{CH}_2\text{Cl}_2$ ) as a clear liquid.  $^1\text{H}$  NMR (300 MHz,  $\text{DMSO}-d_6$ )  $\delta$  5.05-4.98 (m, 1H), 4.24-4.07 (m, 2H), 2.91 (t, 1H,  $J = 2.7$  Hz), 2.53 (dd, 1H,  $J = 2.6, 6.4$  Hz), 2.01 (s, 6H).

#### **1-(2-Deoxy-β-D-ribofuranosyl)-4-(4-pentyne-1,2-diacetate)-1-propynyl]-2-nitropyrrole**

**(Di(OAc)1-dPx).** A Di(OAc)1 linker (276 mg, 1.5 mmol) was added to a solution of 1-(2-deoxy-β-D-ribofuranosyl)-4-iodo-2-nitropyrrole (354 mg, 1 mmol), CuI (31 mg, 0.16 mmol),  $\text{Pd}(\text{PPh}_3)_4$  (58 mg, 0.05 mmol), and TEA (208  $\mu\text{l}$ , 1.5 mmol) in DMF (5 ml). The reaction mixture was stirred at room temperature for 14 h, and was evaporated *in vacuo*. The product was purified by chromatography on a silica gel column (eluted with 7% MeOH in  $\text{CH}_2\text{Cl}_2$ ), and by RP-HPLC (40-45%  $\text{CH}_3\text{CN}$  in  $\text{H}_2\text{O}$ , 9 min) to give 400 mg (97%) of (Di(OAc)1-dPx) as a yellow liquid.  $^1\text{H}$

NMR (300 MHz, DMSO-*d*<sub>6</sub>)  $\delta$  7.92 (d, 1H, *J* = 2.2 Hz), 7.28 (d, 1H, *J* = 2.2 Hz), 6.54 (t, 1H, *J* = 5.6 Hz), 5.27 (d, 1H, *J* = 4.5 Hz), 5.11-5.04 (m, 2H), 4.29-4.12 (m, 3H), 3.86-3.82 (m, 1H), 3.69-3.52 (m, 2H), 2.74 (d, 2H, *J* = 6.3 Hz), 2.47-2.38 (m, 1H), 2.27-2.19 (m, 1H), 2.04, 2.02 (s, s, 3H, 3H). HR-MS (FAB, NBA matrix) calcd. for C<sub>18</sub>H<sub>23</sub>N<sub>2</sub>O<sub>9</sub> (M+H)<sup>+</sup> 411.1409, found 411.1403.

**1-(2-Deoxy- $\beta$ -D-ribofuranosyl)-4-(4-pentyne-1,2-diol)-1-propynyl]-2-nitropyrrole**

**5'-triphosphate (Diol1-dPxTP).** The di(OAc)1-dPx nucleoside (41 mg, 0.1 mmol) was evaporated to dryness with pyridine and toluene. The nucleoside and proton sponge (33 mg, 0.15 mmol) were dissolved in (CH<sub>3</sub>O)<sub>3</sub>PO (500  $\mu$ l), and POCl<sub>3</sub> (13  $\mu$ l, 0.13 mmol) was added to the solution at 0 °C. After the reaction mixture was stirred at 0°C for 1 h, tri-*n*-butylamine (120  $\mu$ l) and bis-tri-*n*-butylammonium pyrophosphate (1.0 ml, 0.5 M DMF solution) were added to the reaction mixture. After 30 min, 500  $\mu$ l of 0.5 M triethylamine bicarbonate and water (5.0 ml) were added to the reaction mixture, which was stirred at 0°C for 30 min. After lyophilization, the compound in H<sub>2</sub>O (4.0 ml) was treated with 28% NH<sub>4</sub>OH (20 ml) at room temperature for 90 min. After the volatile components were removed, the product was purified by DEAE Sephadex A-25 ion exchange column chromatography (eluted with a linear gradient of 50 mM to 1.0 M TEAB) and RP-HPLC (10-40% CH<sub>3</sub>CN in 100 mM TEAA, 9 min) to give 24  $\mu$ mol (24%) of Diol1-dPxTP. <sup>1</sup>H NMR (300 MHz, D<sub>2</sub>O)  $\delta$  7.79 (d, 1H, *J* = 2.1 Hz), 7.39 (d, 1H, *J* = 2.1 Hz), 6.77 (t, 1H, *J* = 6.0 Hz), 4.66-4.61 (m, 1H), 4.27-4.22 (m, 3H), 3.98-3.91 (m, 1H), 3.74-3.60 (m, 2H), 3.20 (q, 22H, *J* = 7.3 Hz), 2.72-2.46 (m, 4H), 1.28 (t, 32H, *J* = 7.3 Hz). <sup>31</sup>P NMR (121 MHz, D<sub>2</sub>O)  $\delta$  -9.83 (d, 1P, *J* = 19.8 Hz), -10.66 (d, 1P, *J* = 20.0 Hz), -22.53 (t, 1P, *J* = 20.1 Hz). ESI-MS: calcd. for C<sub>14</sub>H<sub>21</sub>N<sub>2</sub>O<sub>16</sub>P<sub>3</sub> (M-H)<sup>-</sup> 566.24, found 565.04. UV-vis spectrum (10 mM sodium phosphate buffer pH 7.0)  $\lambda_{\text{max}}$  = 374 nm ( $\epsilon$  9,400).

## 5. Chemical synthesis of Diol3o3-dPxTP

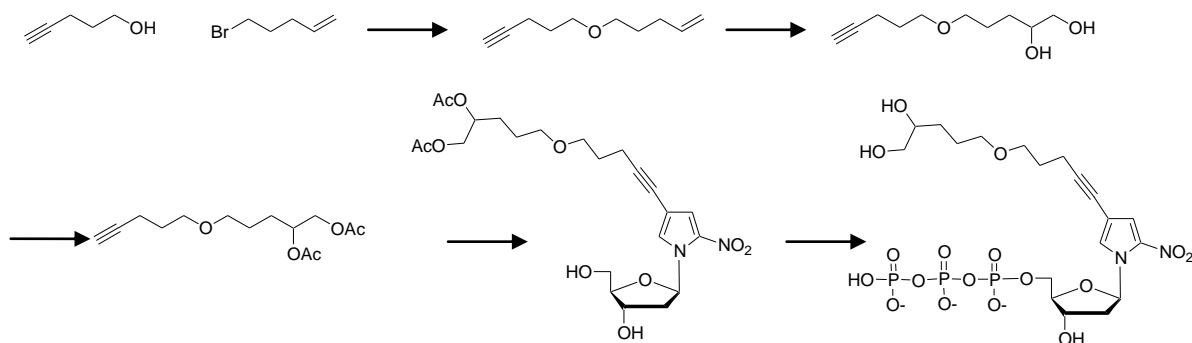

Conditions: (a) KOH, benzene, reflux, 12h (b) OsO<sub>4</sub>, N-methylmorpholine-*N*-oxide, acetone:H<sub>2</sub>O:*t*BuOH (4:1:1, v/v/v), r.t., 1h (c) Ac<sub>2</sub>O, pyridine, r.t., 12h, 24% 3 steps (d) CuI, I-dPn, Pd(PPh<sub>3</sub>)<sub>4</sub>, TEA, DMF, r.t., 12h, 24% (e) (i) POCl<sub>3</sub>, proton sponge, TBA, bis(tributylammonium)pyrophosphate (ii) 28% NH<sub>4</sub>OH, r.t., 1h

**5-(4-Pentynyloxy)pentane-1,2-diacetate (Di(OAc)3o3 linker).** A mixture of 4-pentyn-1-ol (4.65 ml, 50 mmol), 5-bromo-1-pentene (17.8 ml, 150 mmol), and KOH (12.6 g, 225 mmol) in benzene (50 ml) was refluxed for 12 h. After filtration, the reaction mixture was separated with ethyl acetate and 10% NH<sub>4</sub>Cl. The organic phase was washed with 10% NH<sub>4</sub>Cl and saturated NaCl, dried with Na<sub>2</sub>SO<sub>4</sub>, and evaporated *in vacuo*. The product was purified by silica gel chromatography (eluted with 10% EtOAc in hexane) to give 6.5 g of crude 5-(4-pentynyloxy)-1-pentene. OsO<sub>4</sub> (543 mg, 2.0 mmol) was added to a solution of crude 5-(4-pentynyloxy)-1-pentene (6.5 g) and N-methylmorpholine-*N*-oxide (10.0 g, 85.4 mmol) in acetone/H<sub>2</sub>O/*t*BuOH (4:1:1, 214 ml). The reaction mixture was stirred at room temperature for 1 h. NaHSO<sub>3</sub> (1.5 g) was then added to the reaction mixture. After the resulting precipitate was removed by filtration and washed with MeOH, the filtered solution was concentrated *in vacuo*. The product was purified by silica gel column chromatography (eluted with 3% MeOH in CH<sub>2</sub>Cl<sub>2</sub>) to give crude 5-(4-pentynyloxy)pentane-1,2-diol (2.9 g). After the crude 5-(4-pentynyloxy)pentane-1,2-diol (2.9 g) was co-evaporated with pyridine, acetic anhydride (5.9 ml, 62.4 mmol) was added to the crude diol in

pyridine (78 ml). The reaction mixture was stirred at room temperature for 9 h. The reaction mixture was extracted by ethyl acetate and a 5% NaHCO<sub>3</sub> solution and the organic phase was dried by Na<sub>2</sub>SO<sub>4</sub> and evaporated *in vacuo*. 5-(4-Pentynyloxy)pentane-1,2-diacetate (Di(OAc)3o3 linker), 3.27g, 24% 3 steps) was purified by silica gel column chromatography (20 % hexane in CH<sub>2</sub>Cl<sub>2</sub>) as a clear liquid. <sup>1</sup>H NMR (300 MHz, DMSO-*d*<sub>6</sub>) δ 4.96 (m, 1H), 4.16 (dd, 1H, *J* = 3.3, 12.0 Hz), 4.01 (dd, 1H, *J* = 6.4, 11.9 Hz), 3.39 (t, 2H, *J* = 6.4 Hz), 3.33 (t, 2H, *J* = 6.2 Hz), 2.74 (t, 1H, *J* = 2.7 Hz), 2.18 (dt, 2H, *J* = 2.6, 7.2 Hz), 1.66-1.45 (m, 6H). HR-MS (FAB, NBA matrix) calcd. for C<sub>14</sub>H<sub>23</sub>O<sub>5</sub> (M+H)<sup>+</sup> 271.1545, found 271.1592.

**1-(2-Deoxy-β-D-ribofuranosyl)-4-[5-(4-pentynyloxy)pentane-1,2-diacetate]-1-propynyl]-2-nitropyrrrole (Di(OAc)3o3-dPx).** A di(OAc)3o3 linker (180 mg, 0.7 mmol) was added to a solution of 1-(2-deoxy-β-D-ribofuranosyl)-4-iodo-2-nitropyrrrole (177 mg, 0.5 mmol), CuI (19 mg, 0.1 mmol), Pd(PPh<sub>3</sub>)<sub>4</sub> (29 mg, 0.025 mmol), and TEA (104 μl, 0.75 mmol) in DMF (2.5 ml). The reaction mixture was stirred at room temperature for 13 h, and then evaporated *in vacuo*. The product was purified by silica gel column chromatography (eluted with 5% MeOH in CH<sub>2</sub>Cl<sub>2</sub>), and RP-HPLC (50-55% CH<sub>3</sub>CN in H<sub>2</sub>O, 10 min) to give 60 mg (24%) of (Di(OAc)3o3-dPx) as a yellow liquid. <sup>1</sup>H NMR (300 MHz, DMSO-*d*<sub>6</sub>) δ 7.91 (d, 1H, *J* = 2.2 Hz), 7.28 (d, 1H, *J* = 2.2 Hz), 6.55 (t, 1H, *J* = 5.7 Hz), 5.29 (d, 1H, *J* = 4.5 Hz), 5.10 (t, 1H, *J* = 5.2 Hz), 4.97 (m, 1H), 4.24 (m, 1H), 4.16 (dd, 1H, *J* = 3.3, 12.0 Hz), 4.01 (dd, 1H, *J* = 6.5, 11.9 Hz), 3.85 (m, 1H), 3.70-3.53 (m, 2H), 3.44 (t, 2H, *J* = 6.2 Hz), 3.36 (t, 2H, *J* = 6.1 Hz), 2.45-2.39 (m, 3H), 2.28-2.19 (m, 2H), 2.01, 2.00 (s, s, 3H, 3H), 1.76 -1.47 (m, 6H). HR-MS (FAB, NBA matrix) calcd. for C<sub>23</sub>H<sub>33</sub>N<sub>2</sub>O<sub>10</sub> (M+H)<sup>+</sup> 497.2135, found 497.2110.

**1-(2-Deoxy-β-D-ribofuranosyl)-4-[5-(4-pentynyloxy)pentane-1,2-diol]-1-propynyl]-2-nitropyrrrole 5'-triphosphate (Diol3o3-dPxTP).** A di(OAc)3o3-dPx nucleoside (50 mg, 0.1 mmol) was evaporated to dryness with pyridine and toluene, and the nucleoside and a proton sponge (33 mg, 0.15 mmol) were dissolved in (CH<sub>3</sub>O)<sub>3</sub>PO (500 μl). POCl<sub>3</sub> (13 μl, 0.13 mmol) was added to the solution at 0 °C. After the reaction mixture was stirred at 0°C for 1.5 h, tri-*n*-butylamine (120 μl) and bis-tri-*n*-butylammonium

pyrophosphate (1.0 ml, 0.5 M DMF solution) were added to the reaction mixture. After 30 min, 500  $\mu$ l of 0.5 M triethylamine bicarbonate and water (5.0 ml) were added to the reaction mixture, which was stirred at 0°C for 30 min. After lyophilization, the compound in H<sub>2</sub>O (2.0 ml) was treated with 28% NH<sub>4</sub>OH at room temperature for 1h. After the volatile components were removed, the product was purified by DEAE Sephadex A-25 ion exchange column chromatography (eluted with a linear gradient of 50 mM to 1.0 M TEAB) and RP-HPLC (5-50% CH<sub>3</sub>CN in 100 mM TEAA, 12 min) to give 18  $\mu$ mol (18%) of Diol3o3-dPxTP. <sup>1</sup>H NMR (300 MHz, D<sub>2</sub>O)  $\delta$  7.73 (d, 1H,  $J$  = 2.1 Hz), 7.37 (d, 1H,  $J$  = 2.1 Hz), 6.76 (t, 1H,  $J$  = 6.1 Hz), 4.62 (m, 1H), 4.26-4.20 (m, 3H), 3.72-3.42 (m, 7H), 3.20 (q, 22H,  $J$  = 7.3 Hz), 2.64 (m, 1H), 2.53-2.44 (m, 3H), 1.89-1.41 (m, 6H), 1.28 (t, 32H,  $J$  = 7.3 Hz). <sup>31</sup>P NMR (121 MHz, D<sub>2</sub>O)  $\delta$  -10.07 (d, 1P,  $J$  = 19.7 Hz), -10.63 (d, 1P,  $J$  = 20.1 Hz), -22.55 (t, 1P,  $J$  = 20.0 Hz). ESI-MS: calcd. for C<sub>19</sub>H<sub>30</sub>N<sub>2</sub>O<sub>17</sub>P<sub>3</sub> (M-H)<sup>-</sup> 651.37, found 651.39. UV-vis spectrum (10 mM sodium phosphate buffer pH 7.0)  $\lambda_{\text{max}}$  = 374 nm ( $\epsilon$  9,200).

## 6. Chemical synthesis of DMP-hx-dPxTP

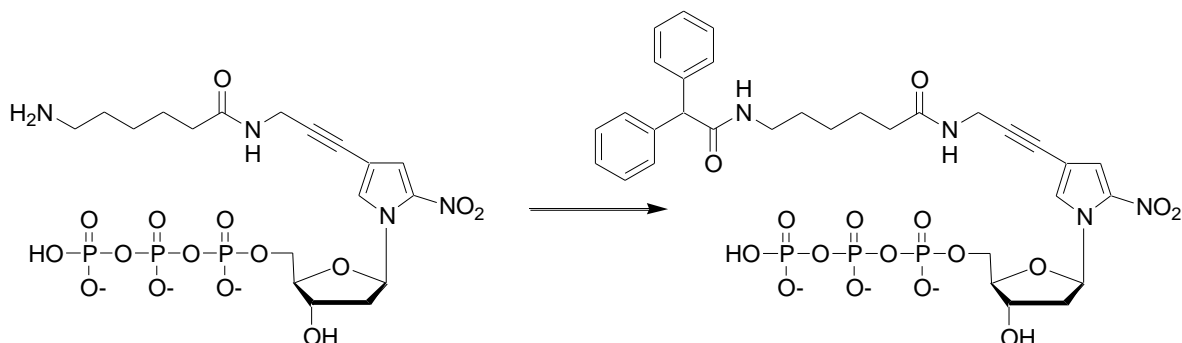

Condition: *N*-hydroxysuccinimide ester, triethylamine, 70% DMF-H<sub>2</sub>O, rt.

**Diphenyl acetic acid *N*-hydroxysuccinimidyl ester.** Diphenyl acetic acid (216 mg, 1.02 mmol), *N*-hydroxysuccinimide (177 mg, 1.53 mmol) and 1-(3-dimethylaminopropyl)-3-ethylcarbodiimide hydrochloride (290 mg, 1.51 mmol) were dissolved in dry CH<sub>2</sub>Cl<sub>2</sub> (5 ml) and stirred at room temperature for 7 h. The reaction mixture was diluted with CH<sub>2</sub>Cl<sub>2</sub> (20 ml) and washed with an aqueous solution of saturated NaHCO<sub>3</sub> (10 ml) and brine (10 ml). The organic phase was dried over Na<sub>2</sub>SO<sub>4</sub>, and evaporated. The purification by the automated flash column chromatography system (Yamazen, AI-580, Hi-Flash Silica gel column, CH<sub>2</sub>Cl<sub>2</sub>-CH<sub>3</sub>OH) afforded the title compound as a white solid (156 mg, 0.50 mmol, 49%). <sup>1</sup>H NMR (300 MHz, CDCl<sub>3</sub>) δ 7.38-7.29 (m, 10H), 5.35 (s, 1H), 2.82 (s, 4H). (Ref. J. Med. Chem. 2000, 51, 8168.)

**Diphenylmethane-modified dPxTP (DPM-hx-dPxTP).** A solution of NH<sub>2</sub>-hx-dPxTP (30 μmol) in 40% DMF-H<sub>2</sub>O (3.0 ml) was reacted with diphenyl acetic acid *N*-hydroxysuccinimidyl ester (120 μmol) in DMF (3.0 ml) and triethylamine (6.2 μl) at room temperature. After 24 h, the reaction mixture was diluted with H<sub>2</sub>O (18 ml) and filtered using a Steriflip (Millipore) to remove the precipitate thus generated. The filtrate was lyophilized, and then dissolved in TEAA buffer (2 ml). The product (15.4 μmol, 51%) was purified by C18 reverse phase column chromatography (Nacalai COSMOSIL 140C19-OPN, eluted by a linear gradient of 0–30% CH<sub>3</sub>CN in 100 mM TEAA, pH 7.0) and C8 HPLC



(Shiseido, CAPCELLPAK C8, eluted by a linear gradient of 25–50% CH<sub>3</sub>CN in 100 mM TEAA, pH 7.0). <sup>1</sup>H NMR (300 MHz, D<sub>2</sub>O) δ 7.72 (d, 1H, *J* = 2.1 Hz), 7.43-7.33 (m, 6H), 7.26-7.21 (m, 5H), 6.64 (t, 1H, *J* = 5.9 Hz), 5.01 (s, 1H), 4.53 (m, 1H), 4.20 (m, 3H), 4.14 (m, 2H), 2.23-3.16 (m, 1H and (CH<sub>3</sub>CH<sub>2</sub>)<sub>3</sub>N), 2.54 (m, 1H), 2.36 (m, 1H), 2.26 (t, 1H, *J* = 7.0 Hz), 1.63-1.58 (m, 2H), 1.53-1.49 (m, 2H), 1.30-1.35 (m, 1H and (CH<sub>3</sub>CH<sub>2</sub>)<sub>3</sub>N). <sup>31</sup>P NMR (121 MHz, D<sub>2</sub>O), δ -9.47 (d, 1P, *J* = 15.5 Hz), -10.70 (d, 1P, *J* = 19.8 Hz), -22.47 (t, 1P, *J* = 20.0 Hz). ESI-MS: calcd. for C<sub>32</sub>H<sub>37</sub>N<sub>4</sub>O<sub>16</sub>P<sub>3</sub> (M-H)<sup>-</sup> calcd. 827.16, found: 827.02. UV-vis spectrum (10 mM sodium phosphate buffer, pH 7.0) λ<sub>max</sub> = 369 nm, ε<sub>260</sub> = 2,400, ε<sub>369</sub> = 10,700.

## 7. Chemical synthesis of NTP-hx-dPxTP.

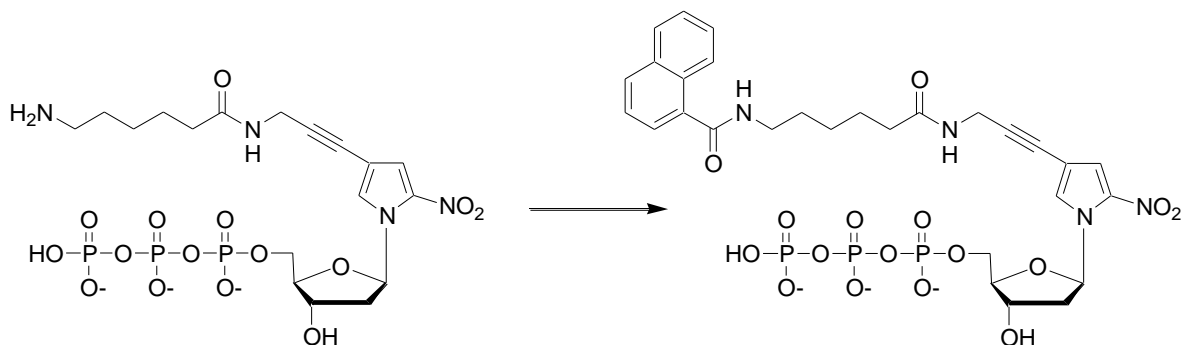

Condition: *N*-hydroxysuccinimide ester, triethylamine, 70% DMF-H<sub>2</sub>O, rt.

**1-Naphthoic acid *N*-hydroxysuccinimidyl ester.** 1-Naphthoic acid (176 mg, 1.02 mmol), *N*-hydroxysuccinimide (174 mg, 1.51 mmol) and 1-(3-dimethylaminopropyl)-3-ethylcarbodiimide hydrochloride (288 mg, 1.50 mmol) were dissolved in dry CH<sub>2</sub>Cl<sub>2</sub> (5 ml) and stirred at room temperature for 18 h. The reaction mixture was extracted with CH<sub>2</sub>Cl<sub>2</sub> (10 ml) and washed with an aqueous solution of saturated NaHCO<sub>3</sub> (10 ml) and brine (10 ml). The organic phase was dried over Na<sub>2</sub>SO<sub>4</sub>, and evaporated. The purification by the automated flash column chromatography system (Yamazen, AI-580, Hi-Flash Silica gel column, CH<sub>2</sub>Cl<sub>2</sub>-CH<sub>3</sub>OH) provided the title compound as a white solid (131 mg, 0.48 mmol, 48%). <sup>1</sup>H NMR (300 MHz, DMSO-*d*<sub>6</sub>) δ 8.62 (dd, 1H, *J* = 7.7, 1.0 Hz), 8.40-8.35 (m, 4H), 8.13 (dd, 1H, *J* = 7.9, 0.7 Hz), 7.79-7.66 (m, 3H), 2.94 (s, 4H). Ref. Tetrahedron Letters 2003, 44(12) 2477-2480.

**Naphthalene-modified dPxTP (NTP-hx-dPxTP).** A solution of NH<sub>2</sub>-hx-dPxTP (30 μmol) in 40% DMF-H<sub>2</sub>O (3.0 ml) was reacted with 1-naphthoic acid *N*-hydroxysuccinimidyl ester (120 μmol) in DMF (3.0 ml) and triethylamine (6.2 μl) at room temperature. After 66 h, the reaction mixture was diluted with H<sub>2</sub>O (18 ml) and filtered using a Steriflip (Millipore) to remove the precipitate thus generated. The filtrate was lyophilized, and then dissolved in TEAA buffer (3 ml). The product (16.4 μmol, 55%) was purified by C18 reverse phase column chromatography (Nacalai COSMOSIL 140C19-OPN, eluted by a

linear gradient of 0–30% CH<sub>3</sub>CN in 100 mM TEAA, pH 7.0) and C8 HPLC (Shiseido, CAPCELLPAK C8, eluted by a linear gradient of 15–50% CH<sub>3</sub>CN in 100 mM TEAA, pH 7.0).

<sup>1</sup>H NMR (300 MHz, D<sub>2</sub>O) δ 8.02-7.93 (m, 3H), 7.65-7.48 (m, 5H), 6.98 (d, 1H, *J* = 2.1 Hz), 6.50 (t, 1H, *J* = 5.9 Hz), 4.53 (m, 1H), 4.18 (m, 3H), 4.10 (s, 2H), 3.49 (t, 1H, *J* = 6.4 Hz), 2.58-2.49 (m, 1H), 2.37-2.26 (m, 3H), 1.79-1.67 (m, 4H), 1.54-1.46 (m, 2H). <sup>31</sup>P NMR (121 MHz, D<sub>2</sub>O), δ 9.91 (d, 1P, *J* = 19.4 Hz), -10.77 (d, 1P, *J* = 20.0 Hz), -22.56 (t, 1P, *J* = 20.0 Hz). ESI-MS: calcd. for C<sub>29</sub>H<sub>34</sub>N<sub>4</sub>O<sub>16</sub>P<sub>3</sub> (M-H)<sup>-</sup> 787.13, found: 787.13. UV-vis spectrum (10 mM sodium phosphate buffer, pH 7.0) λ<sub>max</sub> = 369 nm, ε<sub>260</sub> = 4,900, ε<sub>369</sub> = 9,350.

## 8. Chemical synthesis of BPh-hx-dPxTP.

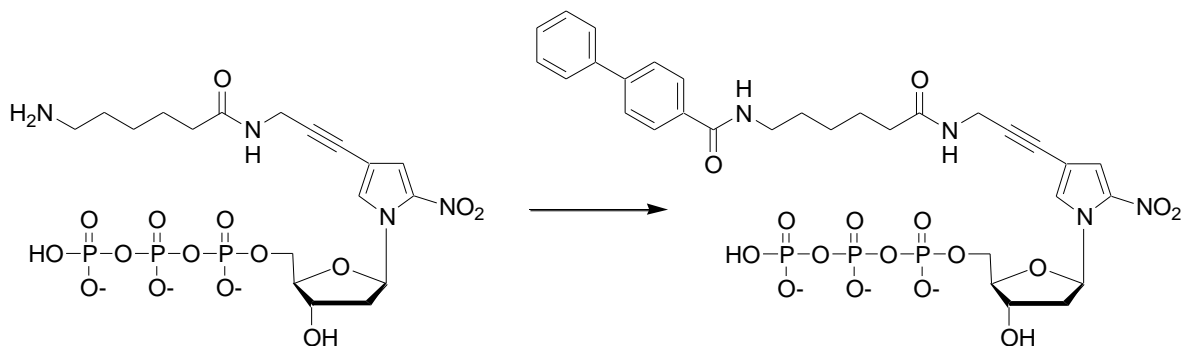

Condition: *N*-hydroxysuccinimide ester, triethylamine, 70% DMF-H<sub>2</sub>O, rt.

**4-Biphenylcarboxylic acid *N*-hydroxysuccinimidyl ester.** 4-Biphenylcarboxylic acid (200 mg, 1.00 mmol), *N*-hydroxysuccinimide (178 mg, 1.55 mmol) and 1-(3-dimethylaminopropyl)-3-ethylcarbodiimide hydrochloride (287 mg, 1.50 mmol) were dissolved in dry CH<sub>2</sub>Cl<sub>2</sub> (5 ml) and stirred at room temperature for 21 h. The reaction mixture was diluted with CH<sub>2</sub>Cl<sub>2</sub> (20 ml) and washed with an aqueous solution of saturated NaHCO<sub>3</sub> (10 ml) and brine (10 ml). The organic phase was dried over Na<sub>2</sub>SO<sub>4</sub>, and evaporated. The crude product was purified by the automated flash column chromatography system (Yamazen, AI-580, Hi-Flash Silica gel column, CH<sub>2</sub>Cl<sub>2</sub>-CH<sub>3</sub>OH). Subsequent reprecipitation in H<sub>2</sub>O (50 ml) and DMF (2.5 ml) afforded the title compound as a white solid (139 mg, 0.47 mmol, 47%). <sup>1</sup>H NMR (300 MHz, DMSO-*d*<sub>6</sub>) δ 8.18 (d, 2H, *J* = 8.6 Hz), 7.97 (d, 2H, *J* = 8.6 Hz), 7.82-7.78 (m, 2H), 7.57-7.44 (m, 3H), 2.91 (s, 4H). Ref. Russ. J. Bioorg. Chem. 2009, 35, 342.

**Biphenyl-modified dPxTP (BPH-hx-dPxTP).** A solution of NH<sub>2</sub>-hx-dPxTP (30 μmol) in 40% DMF-H<sub>2</sub>O (3.0 ml) was reacted with 4-biphenylcarboxylic acid *N*-hydroxysuccinimidyl ester (120 μmol) in DMF (3.0 ml) and triethylamine (6.2 μl) at room temperature. After 51 h, the reaction mixture was diluted with H<sub>2</sub>O (18 ml) and filtered using a Steriflip (Millipore) to remove the precipitate thus generated. The filtrate was lyophilized, and then dissolved in TEAA buffer (3 ml). The product (10.0 μmol, 33%) was purified by C18 reverse phase column chromatography (Nacalai COSMOSIL

140C19-OPN, eluted by a linear gradient from 0–30% CH<sub>3</sub>CN in 100 mM TEAA, pH 7.0) and C1 HPLC (Shiseido, CAPCELLPAK C1, eluted by a linear gradient of 20–50% CH<sub>3</sub>CN in 100 mM TEAA, pH 7.0). <sup>1</sup>H NMR (300 MHz, D<sub>2</sub>O) δ 7.76-7.68 (m, 7H), 7.61 (d, 1H, *J* = 2.1 Hz), 7.55-7.7.45 (m, 3H), 7.04 (d, 1H, *J* = 2.1 Hz), 6.38 (t, 1H, *J* = 5.9 Hz), 4.45 (m, 1H), 4.16-4.10 (m, 5H), 3.39 (t, 2H, *J* = 6.6 Hz), 2.42 (m, 1H), 2.32 (t, 1H, *J* = 6.5 Hz), 2.19 (m, 1H), 1.74-1.62 (m, 4H), 1.45 (m, 1H). <sup>31</sup>P NMR (121 MHz, D<sub>2</sub>O), δ -10.33 (d, 1P, *J* = 19.7 Hz), -10.84 (d, 1P, *J* = 19.7 Hz), -22.75 (t, 1P, *J* = 19.8 Hz). ESI-MS: calcd. for C<sub>31</sub>H<sub>36</sub>N<sub>4</sub>O<sub>16</sub>P<sub>3</sub> (M-H)<sup>-</sup> 814.14, found: 813.43. UV-vis spectrum (10 mM sodium phosphate buffer, pH 7.0) λ<sub>max</sub> = 368 nm, ε<sub>260</sub> = 24,600, ε<sub>368</sub> = 10,400.

## 9. Chemical synthesis of HBP-hx-dPxTP.

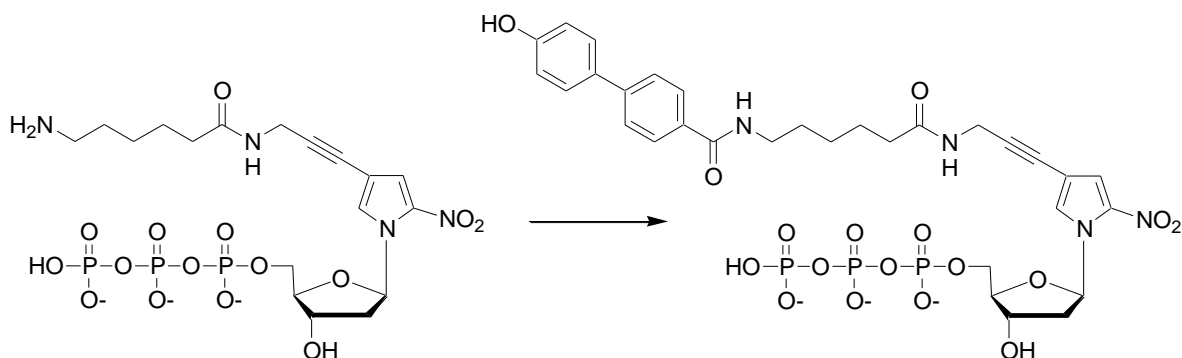

Condition: *N*-hydroxysuccinimide ester, triethylamine, 70% DMF-H<sub>2</sub>O, rt.

### 4'-Hydroxy-4-biphenylcarboxylic acid *N*-hydroxysuccinimidyl ester.

4'-Hydroxy-4-biphenylcarboxylic acid (214 mg, 1.0 mmol), *N*-hydroxysuccinimide (174 mg, 1.50 mmol) and 1-(3-dimethylaminopropyl)-3-ethylcarbodiimide hydrochloride (288 mg, 1.50 mmol) were dissolved in dry THF (10 ml) and dry DMF (4 ml), and stirred at room temperature. After 5 h, the solution was poured into H<sub>2</sub>O (50 ml). The precipitate thus formed was filtered, washed with hexane, and dried in vacuo. The title compound was obtained as a white solid in a 67% yield (207 mg, 0.67 mmol). <sup>1</sup>H NMR (300 MHz, DMSO-*d*<sub>6</sub>) δ 9.84 (s, 1H), 8.11 (dd, 2H, *J* = 6.8, 1.8 Hz), 7.88 (dd, 2H, *J* = 6.8, 1.8 Hz), 7.68-7.64 (m, 2H), 6.93-6.88 (m, 2H), 2.90 (s, 4H). Ref. J. Med. Chem. 2008, 51, 6665-6681.

**4-hydroxybiphenyl-modified dPxTP (HBP-hx-dPxTP).** A solution of NH<sub>2</sub>-hx-dPxTP (30 μmol) in 40% DMF-H<sub>2</sub>O (3.0 ml) was reacted with 4'-hydroxy-4-biphenylcarboxylic acid *N*-hydroxysuccinimidyl ester (120 μmol) in DMF (3.0 ml) and triethylamine (6.2 μl) at room temperature. After 45 h, the reaction mixture was diluted with H<sub>2</sub>O (18 ml) and filtered using a Steriflip (Millipore) to remove the precipitate thus generated. The filtrate was lyophilized, and then dissolved in TEAA buffer (2 ml). The product (13.9 μmol, 46%) was purified by C18 reverse phase column chromatography (Nacalai COSMOSIL 140C19-OPN, eluted by a linear gradient of 0–30% CH<sub>3</sub>CN in 100 mM TEAA, pH 7.0) and C8 HPLC (Shiseido, CAPCELLPAK C8, eluted by a linear gradient of 15–50% CH<sub>3</sub>CN in 100 mM

TEAA, pH 7.0).  $^1\text{H}$  NMR (300 MHz,  $\text{D}_2\text{O}$ )  $\delta$  7.71 (d, 2H,  $J = 8.4$  Hz), 7.62-7.56 (m, 5H), 6.99 (d, 2H,  $J = 7.5$  Hz), 6.97 (s, 1H), 6.36 (t, 1H,  $J = 5.9$  Hz), 4.44 (m, 1H), 4.15-4.09 (m, 5H), 3.39 (t, 2H,  $J = 6.5$  Hz), 2.46-2.38 (m, 1H), 2.32 (t, 2H,  $J = 6.3$  Hz), 2.18-2.12 (m, 1H), 1.73-1.61 (m, 4H), 1.29-1.24 (m, 2H).  $^{31}\text{P}$  NMR (121 MHz,  $\text{D}_2\text{O}$ ),  $\delta$  -9.86 (d, 1P,  $J = 19.6$  Hz), -10.75 (d, 1P,  $J = 19.8$  Hz), -22.55 (t, 1P,  $J = 19.9$  Hz). ESI-MS: calcd. for  $\text{C}_{31}\text{H}_{36}\text{N}_4\text{O}_{17}\text{P}_3$  (M-H) $^-$  829.14, found: 829.14. UV-vis spectrum (10 mM sodium phosphate buffer, pH 7.0)  $\lambda_{\text{max}} = 368$  nm,  $\epsilon_{260} = 14,100$ ,  $\epsilon_{368} = 10,200$ .

## NMR and MS spectra of compounds.

F1.  $^1\text{H}$  NMR (300 MHz,  $\text{D}_2\text{O}$ ) spectrum of dPxTP.

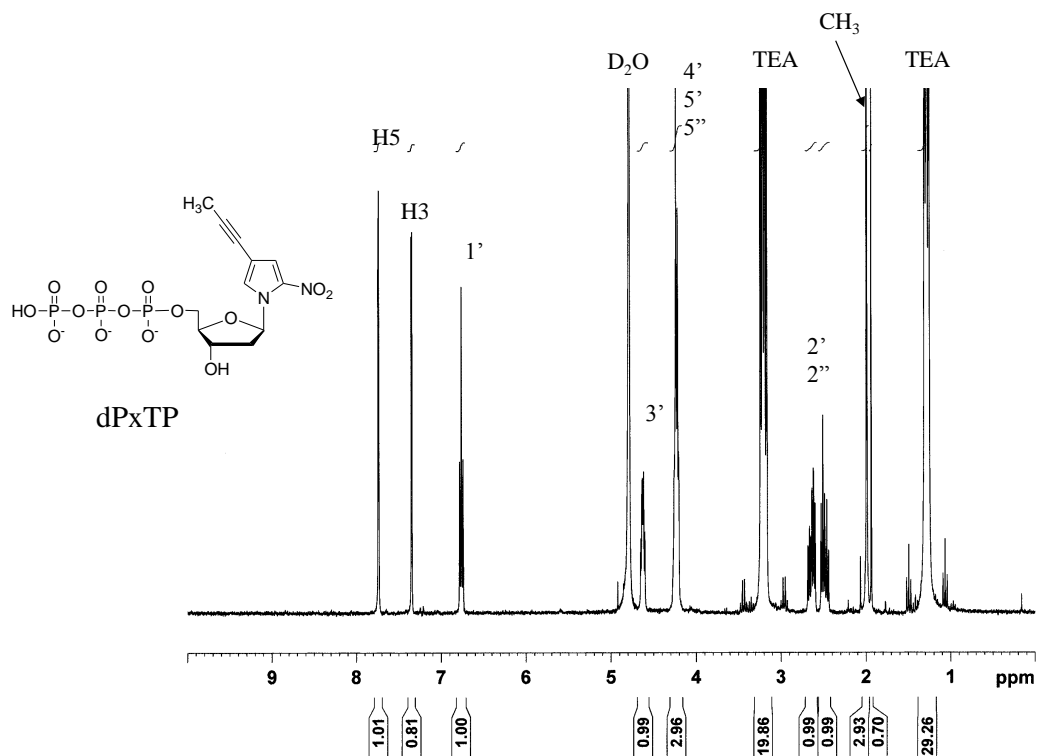

F2.  $^{31}\text{P}$  NMR (121 MHz,  $\text{D}_2\text{O}$ ) spectrum of dPxTP.

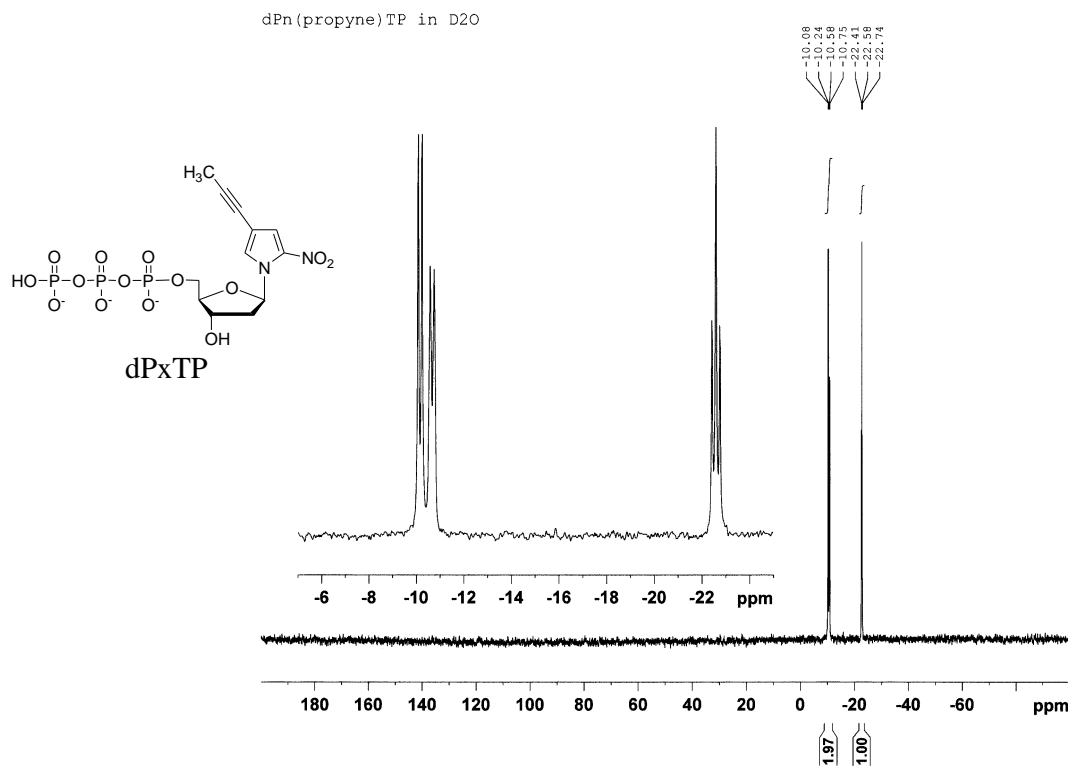



F3. ESI-MS spectrum of dPxTP.

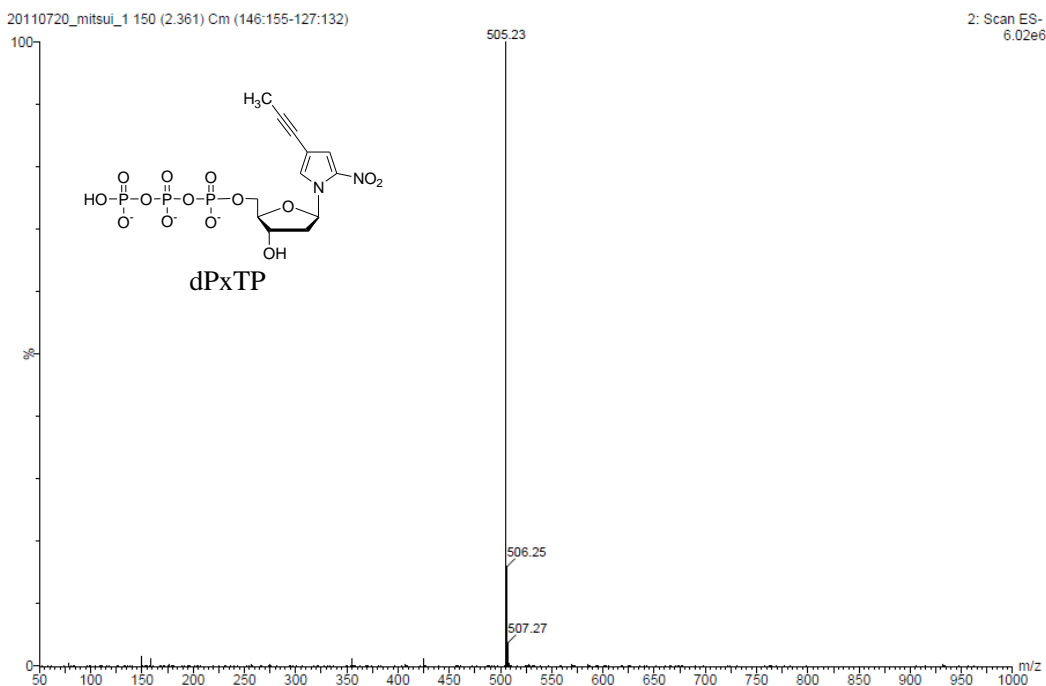

F4.  $^1\text{H}$  NMR (300 MHz,  $\text{D}_2\text{O}$ ) spectrum of  $\text{NH}_2\text{-C1-dPxTP}$ .

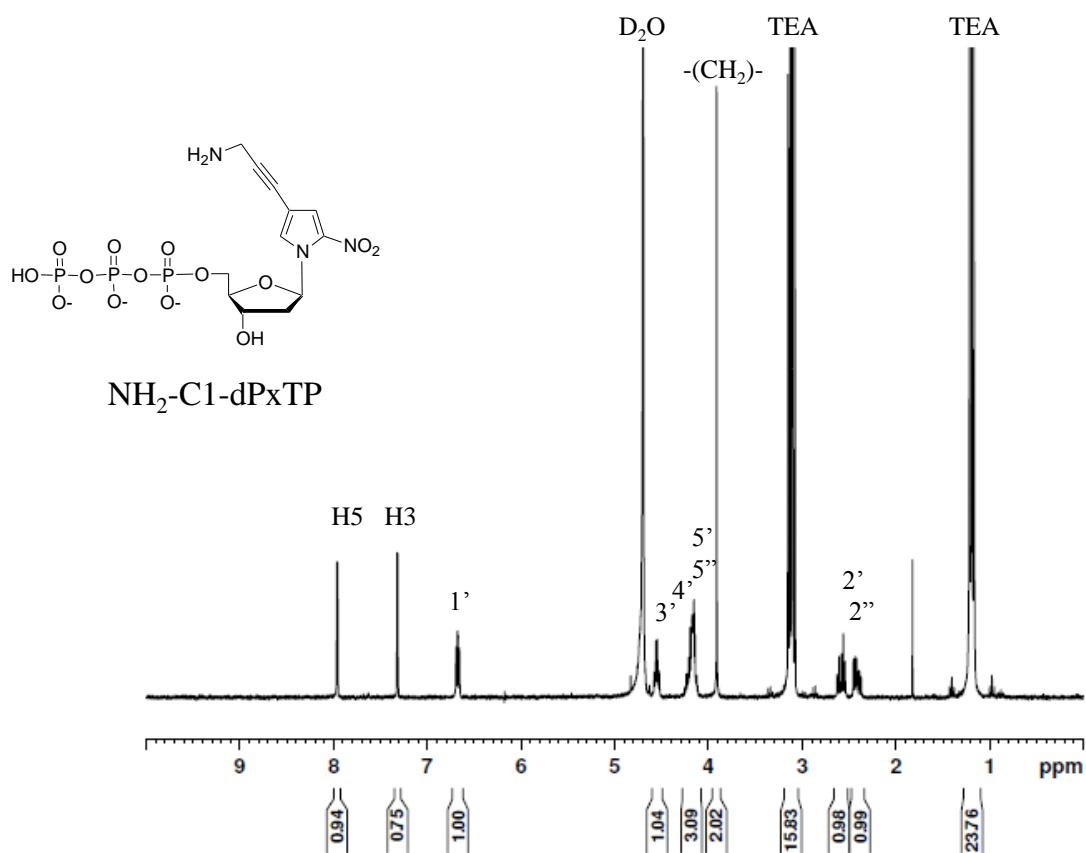

F5.  $^{31}\text{P}$  NMR (121 MHz,  $\text{D}_2\text{O}$ ) spectrum of  $\text{NH}_2\text{-C1-dPxTP}$ .

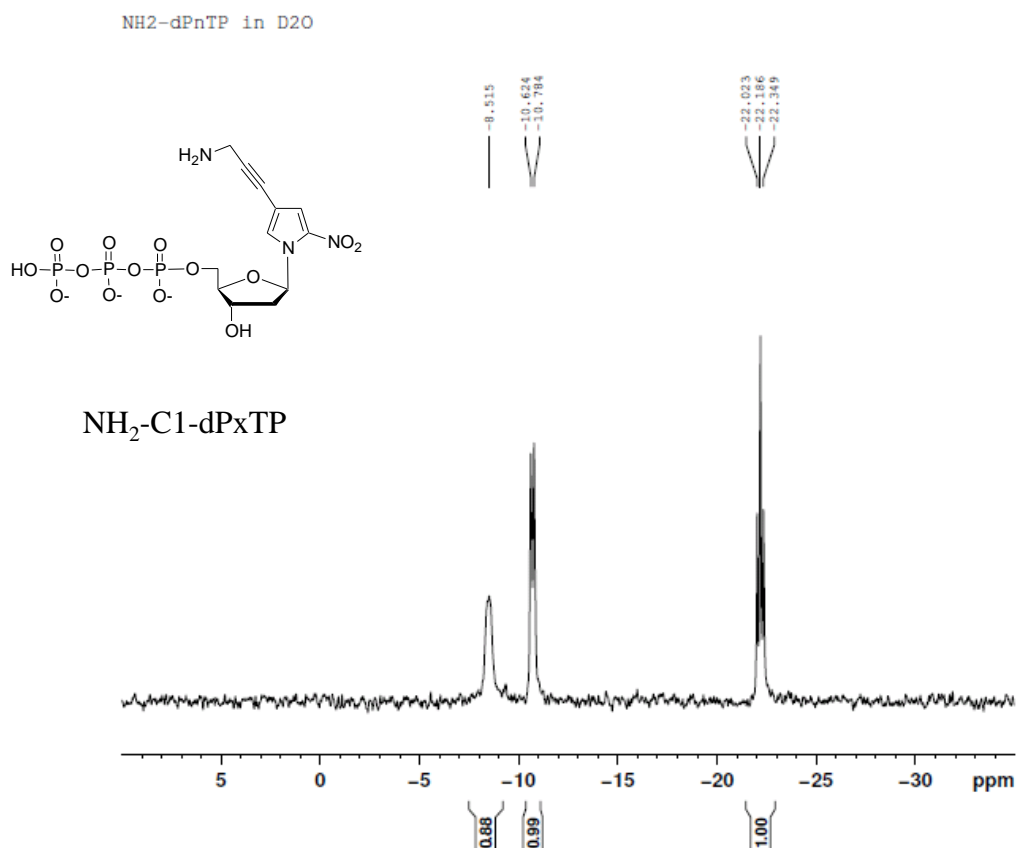

F6. ESI-MS spectrum of  $\text{NH}_2\text{-C1-dPxTP}$ .

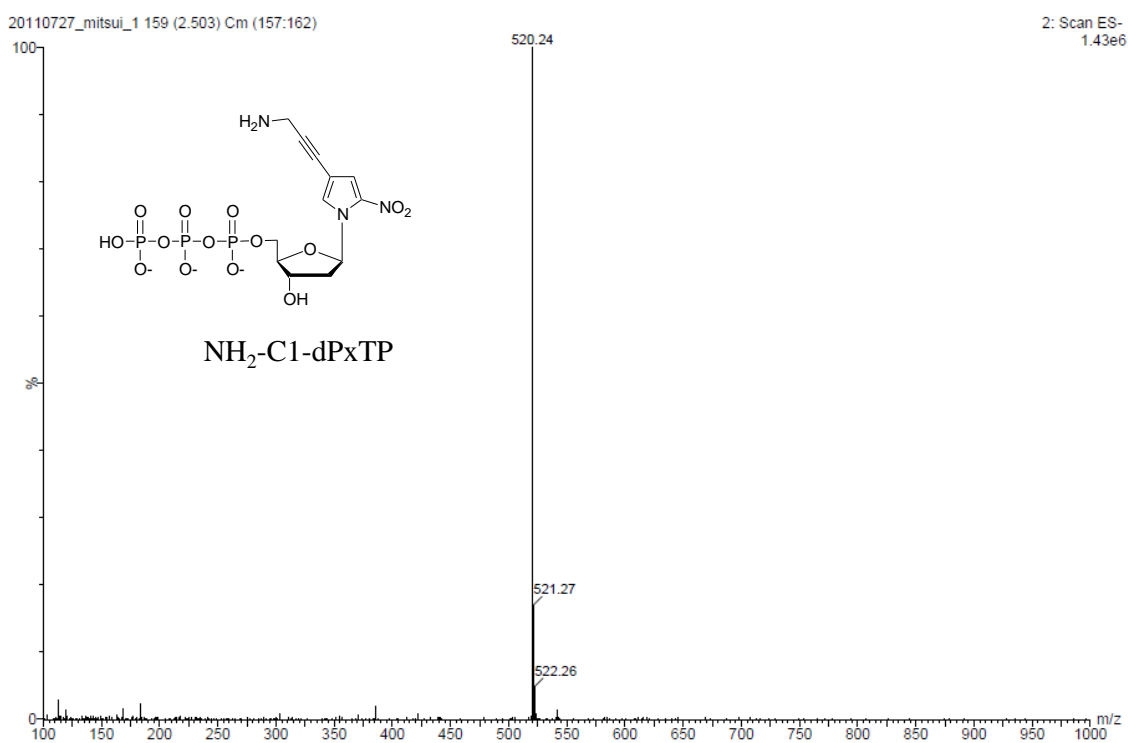

F7.  $^1\text{H}$  NMR (300 MHz,  $\text{D}_2\text{O}$ ) spectrum of Diol1-dPxTP.

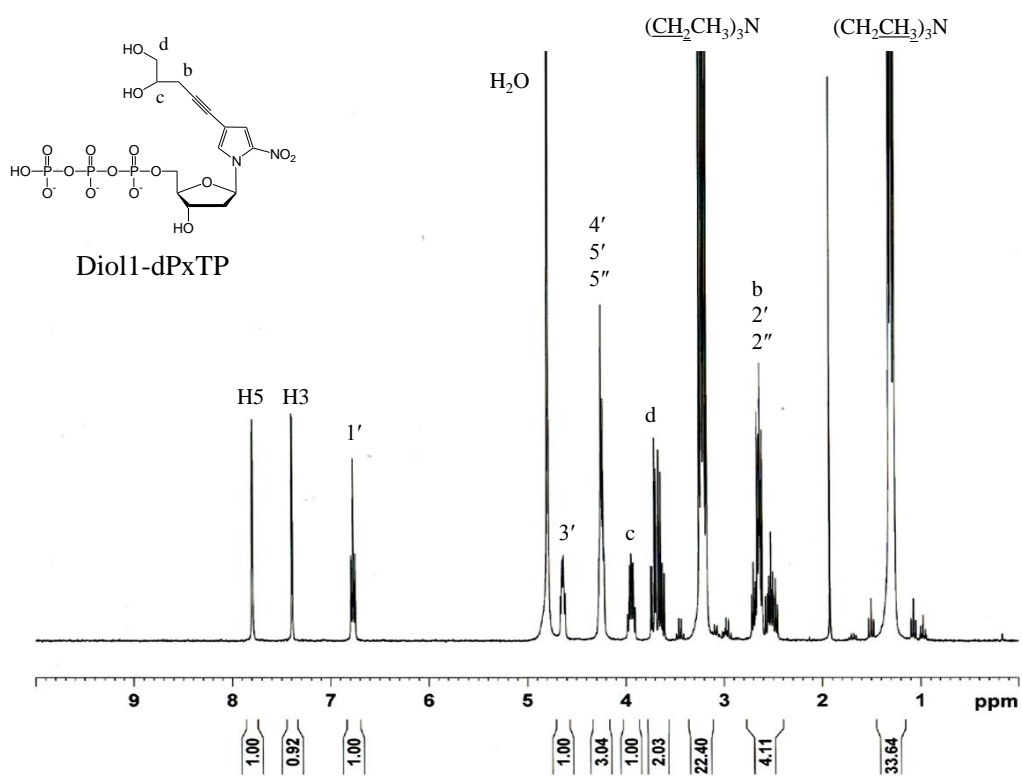

F8.  $^{31}\text{P}$  NMR (121 MHz,  $\text{D}_2\text{O}$ ) spectrum of Diol1-dPxTP.

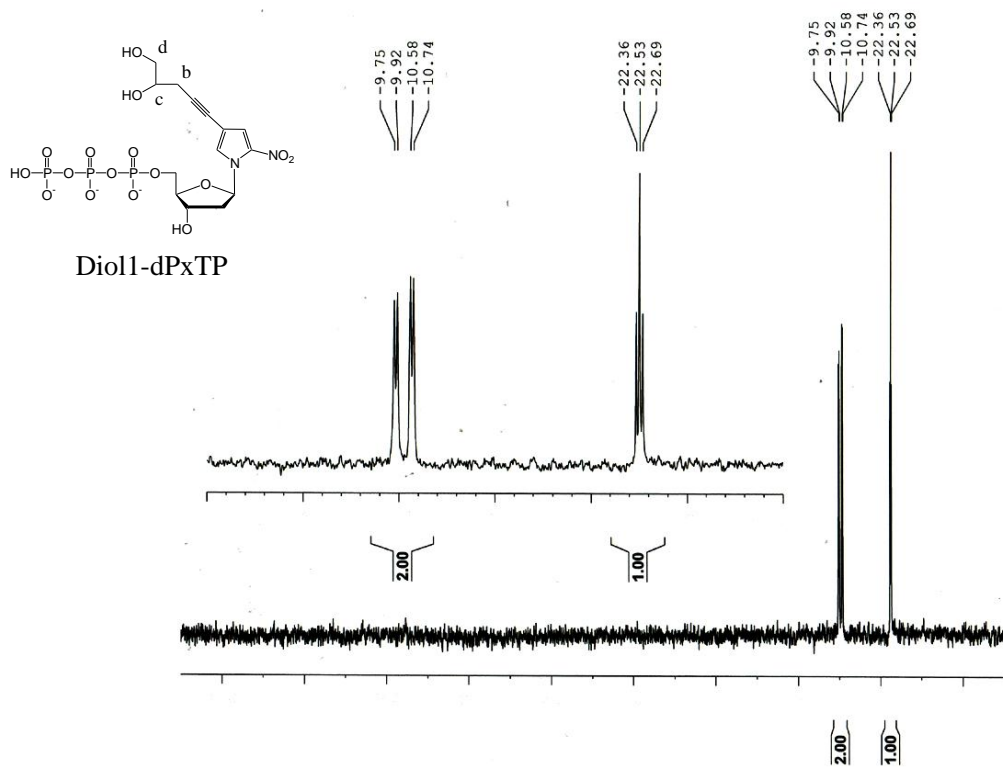

F9. ESI-MS spectrum of Diol1-dPxTP.

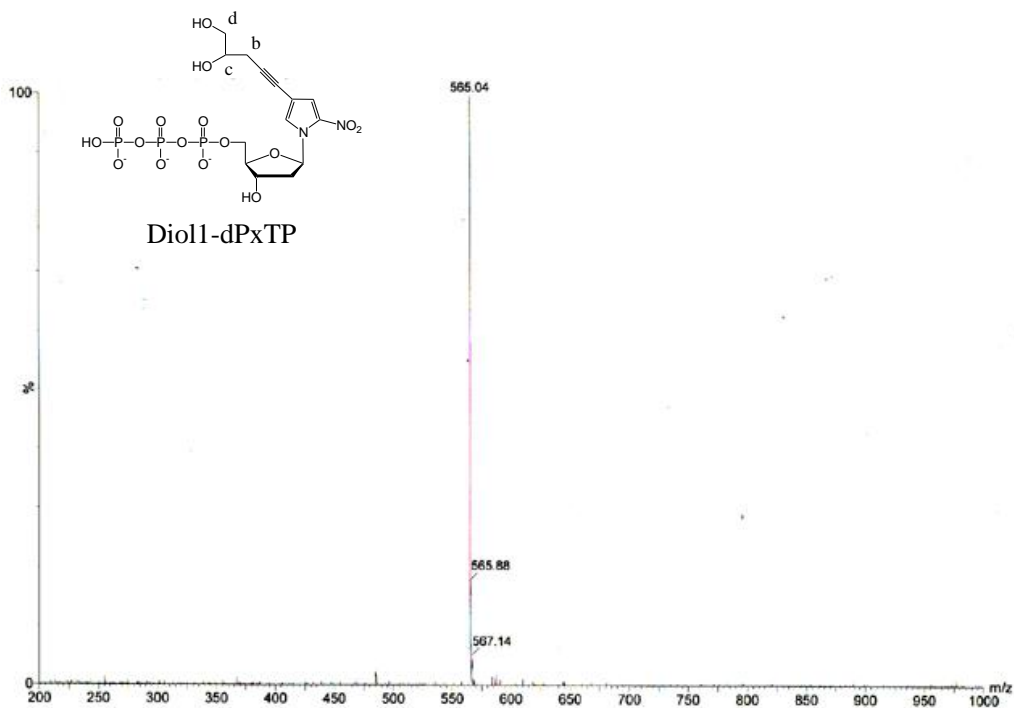

F10.  $^1\text{H}$  NMR (300 MHz,  $\text{D}_2\text{O}$ ) spectrum of Diol3o3-dPxTP.

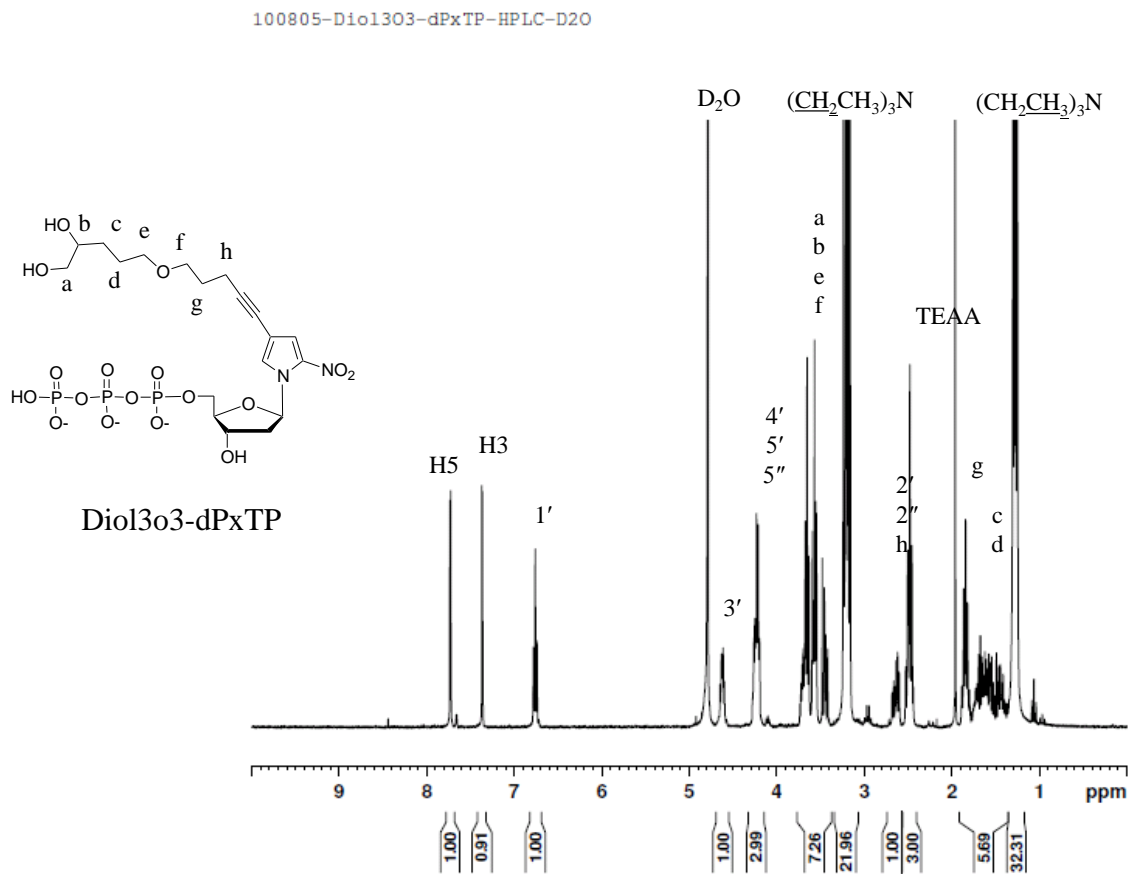

F11.  $^{31}\text{P}$  NMR (121 MHz,  $\text{D}_2\text{O}$ ) spectrum of Diol3o3-dPxTP.

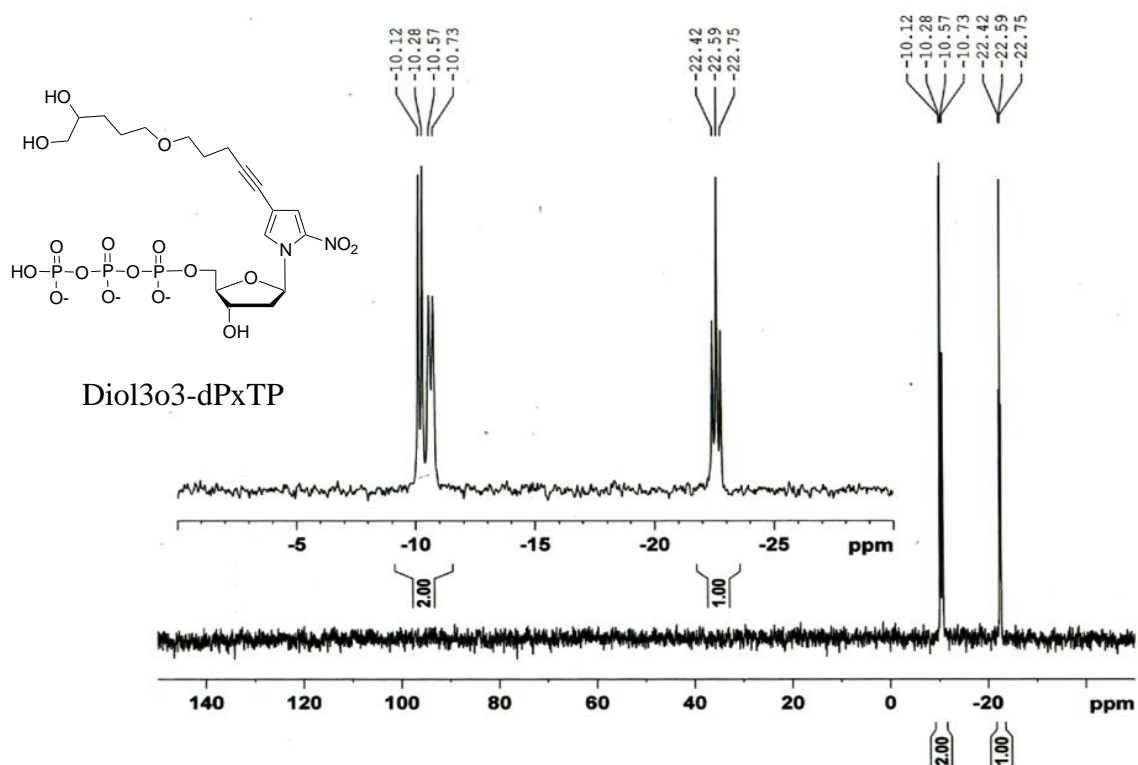

F12. ESI-MS spectrum of Diol3o3-dPxTP.

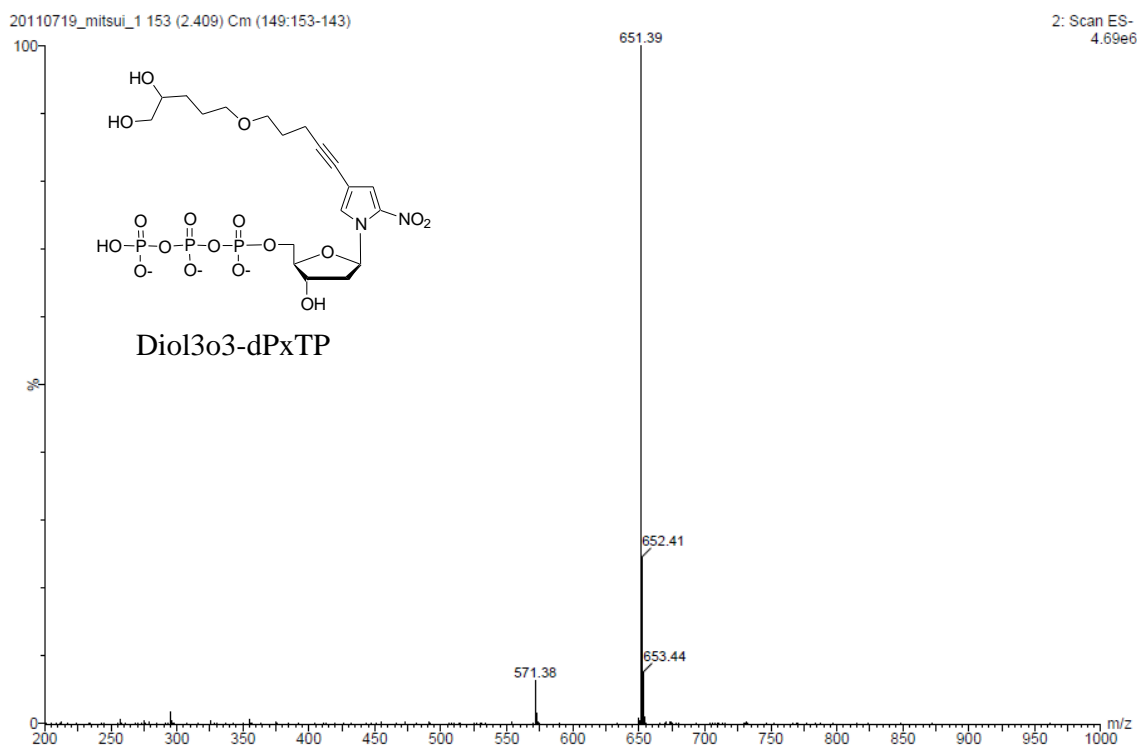

F13.  $^1\text{H}$  NMR (300 MHz,  $\text{D}_2\text{O}$ ) spectrum of DMP-hx-dPxTP.

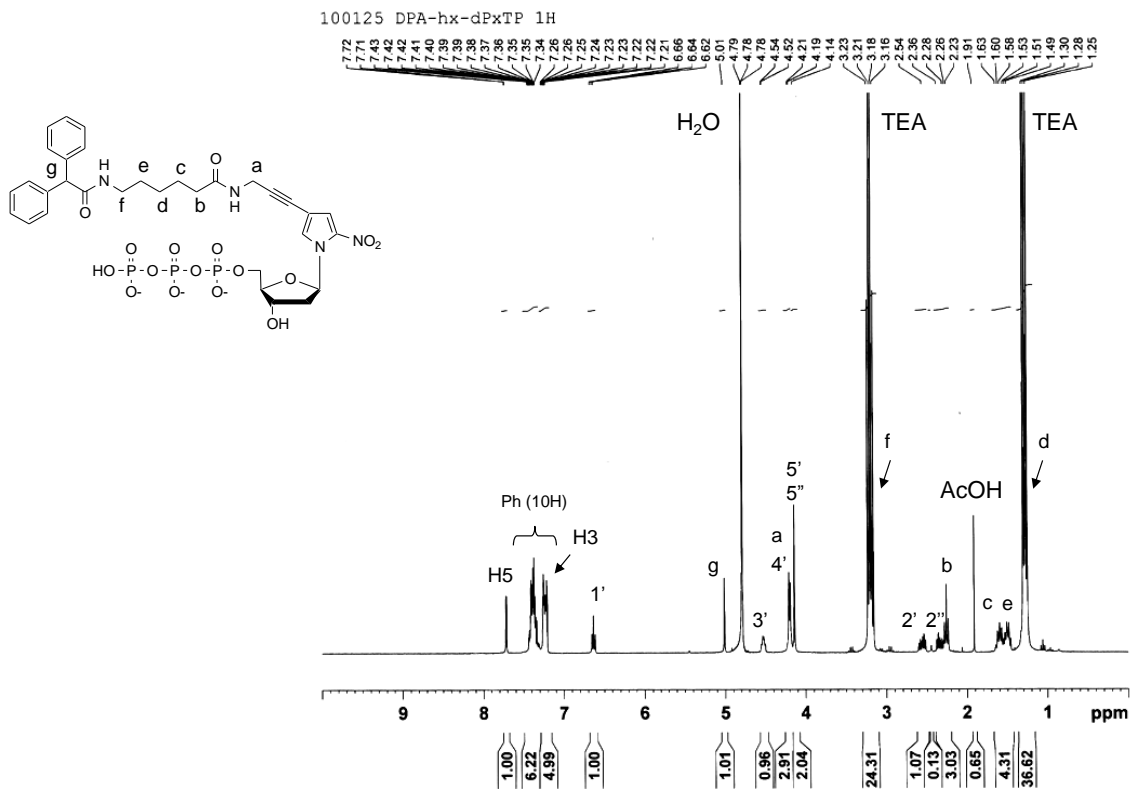

F14.  $^{31}\text{P}$  NMR (121 MHz,  $\text{D}_2\text{O}$ ) spectrum of DMP-hx-dPxTP.

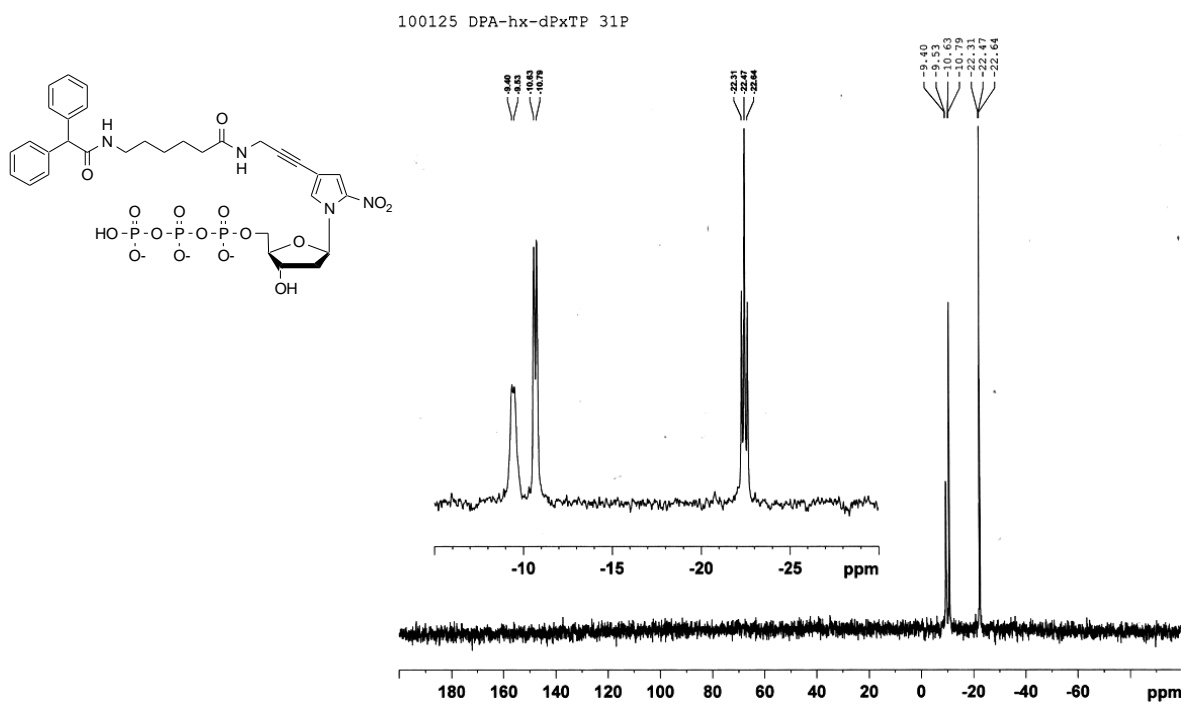

F15. ESI-MS spectrum of DMP-hx-dPxTP.

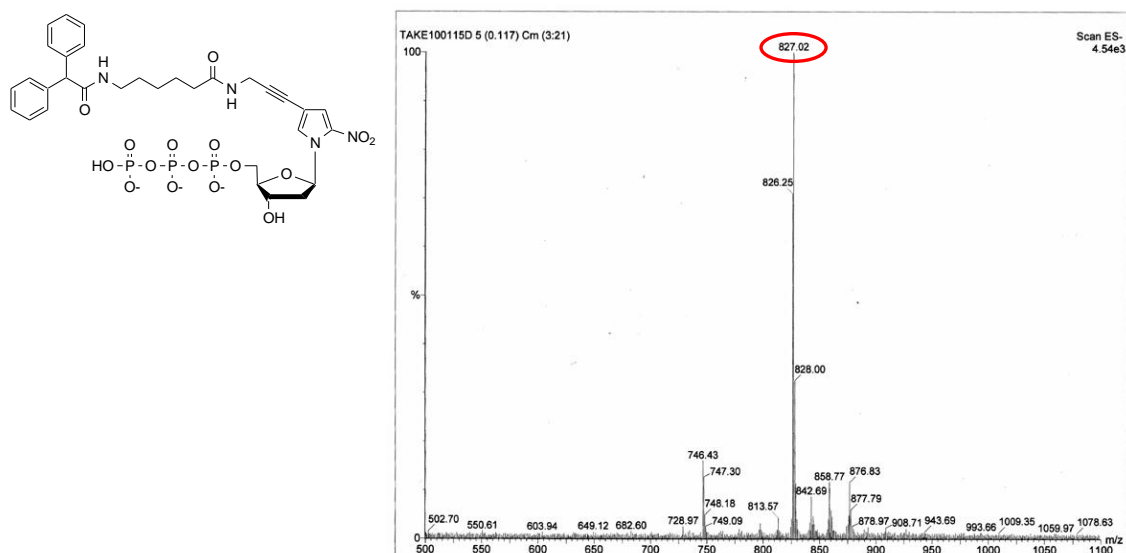

F16.  $^1\text{H}$  NMR (300 MHz,  $\text{D}_2\text{O}$ ) spectrum of NTP-hx-dPxTP.

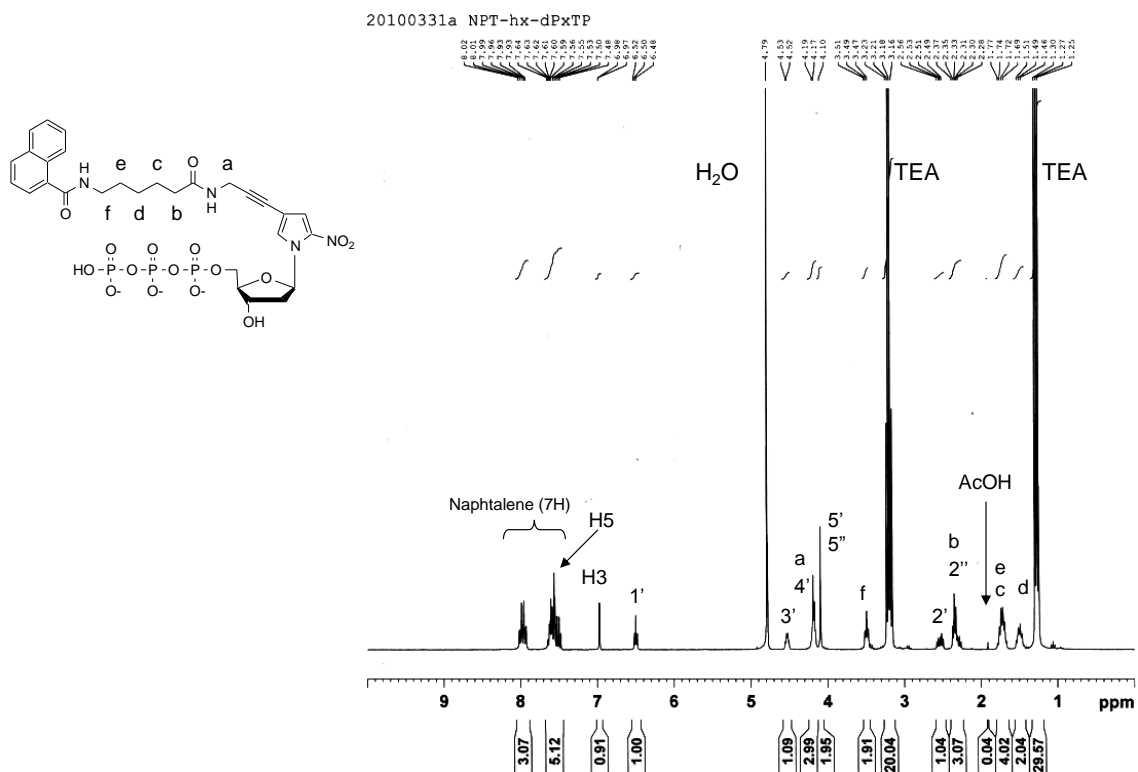

F17.  $^{31}\text{P}$  NMR (121 MHz,  $\text{D}_2\text{O}$ ) spectrum of NTP-hx-dPxTP.

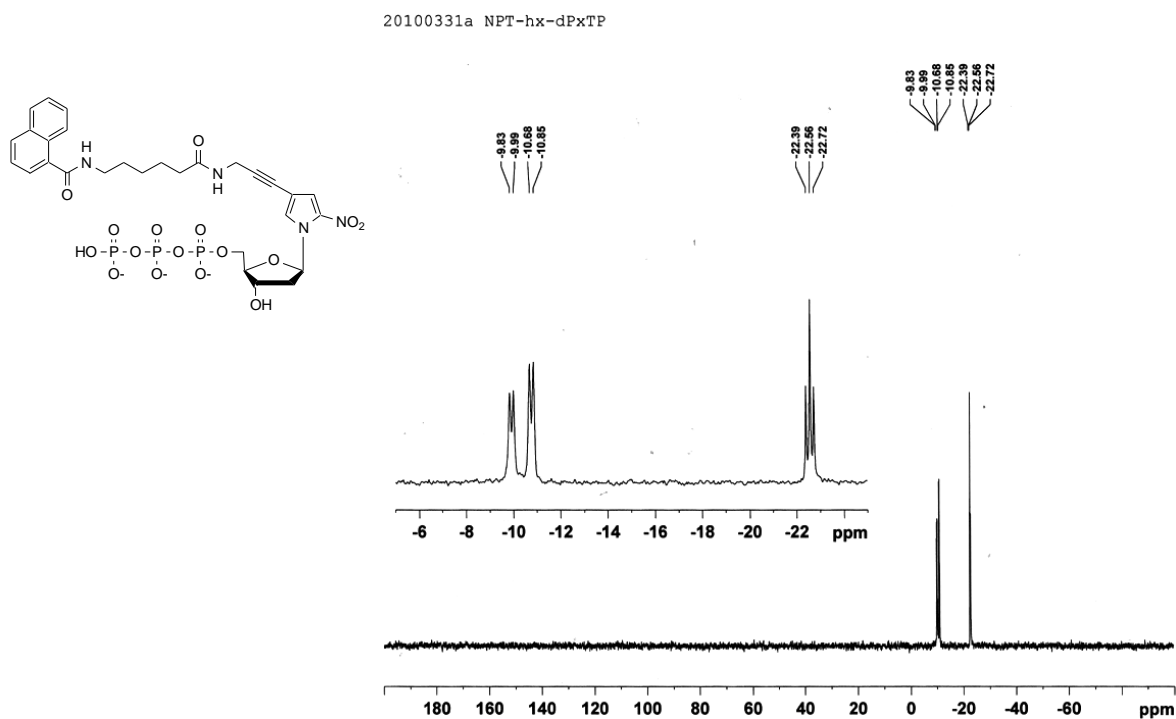

F18. ESI-MS spectrum of NTP-hx-dPxTP.

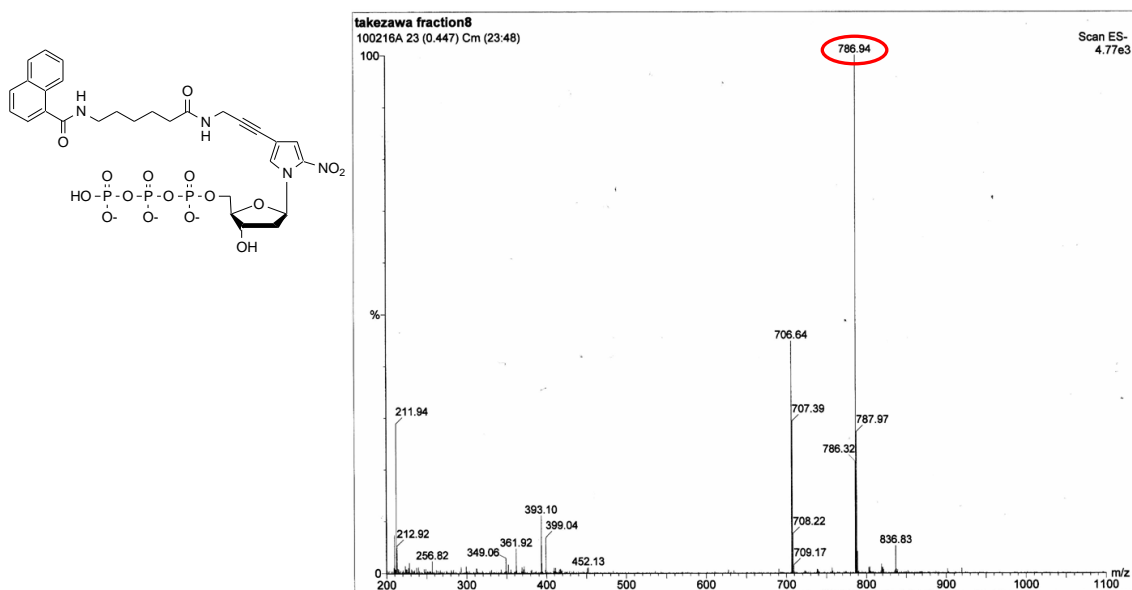



F19.  $^1\text{H}$  NMR (300 MHz,  $\text{D}_2\text{O}$ ) spectrum of BPh-hx-dPxTP.

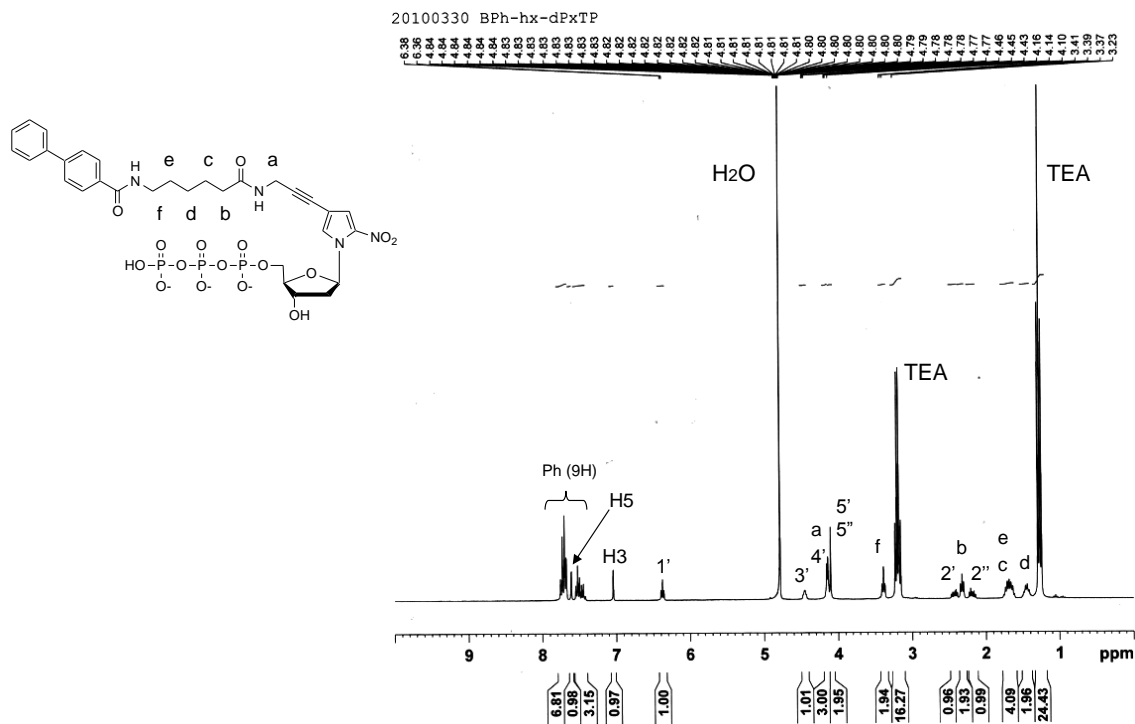

F20.  $^{31}\text{P}$  NMR (121 MHz,  $\text{D}_2\text{O}$ ) spectrum of BPh-hx-dPxTP.

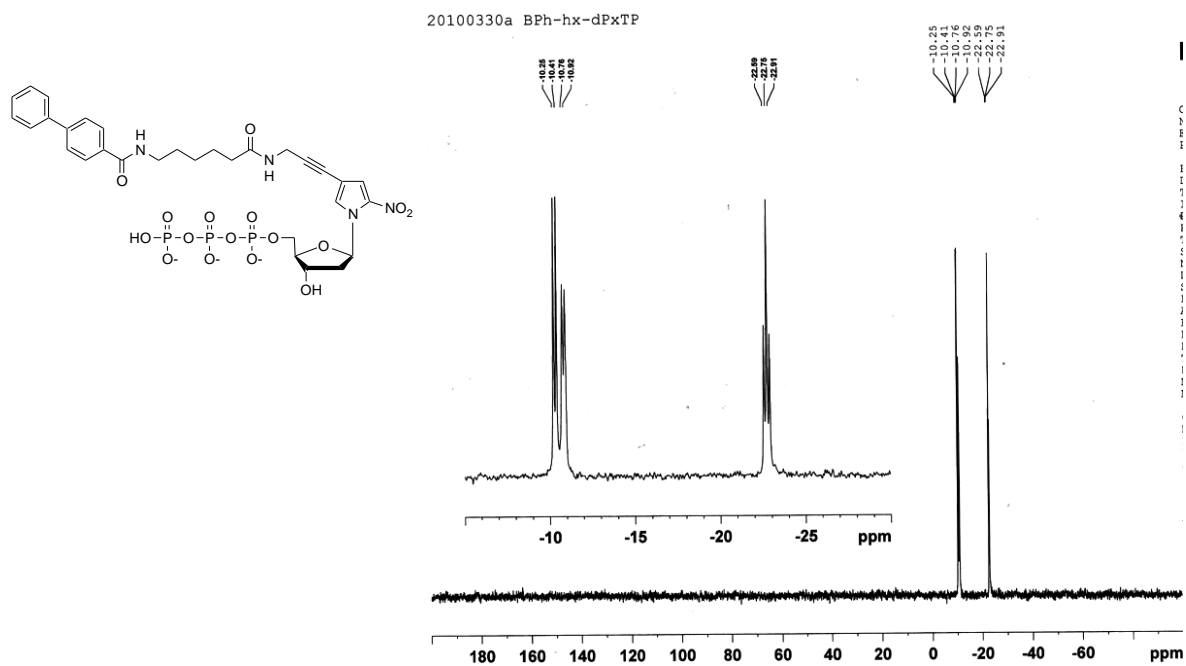

F21. ESI-MS spectrum of BPh-hx-dPxTP.

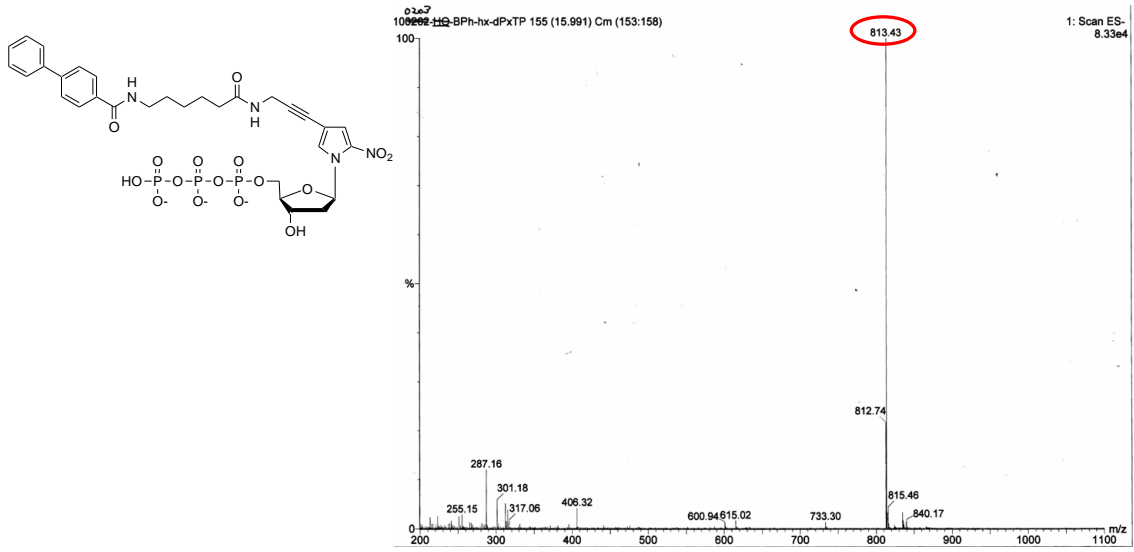

F22. <sup>1</sup>H NMR (300 MHz, D<sub>2</sub>O) spectrum of HBP-hx-dPxTP.

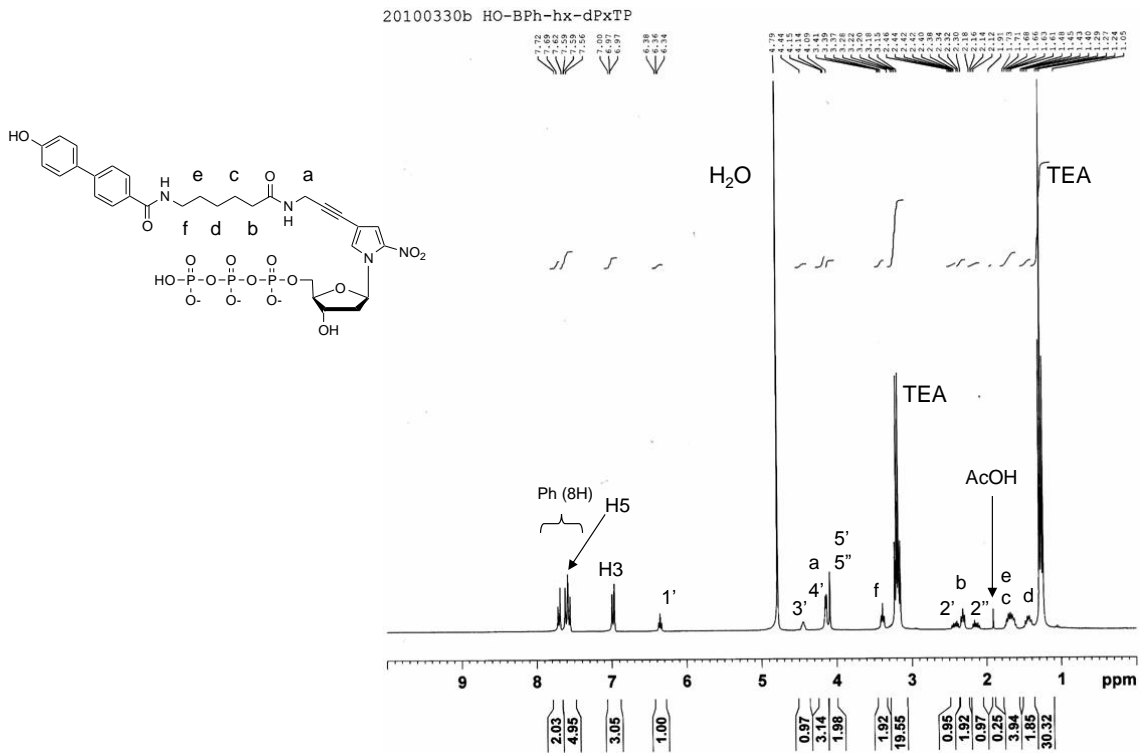

F23.  $^3\text{P}$  NMR (121 MHz,  $\text{D}_2\text{O}$ ) spectrum of HBP-hx-dP $\alpha$ TP.

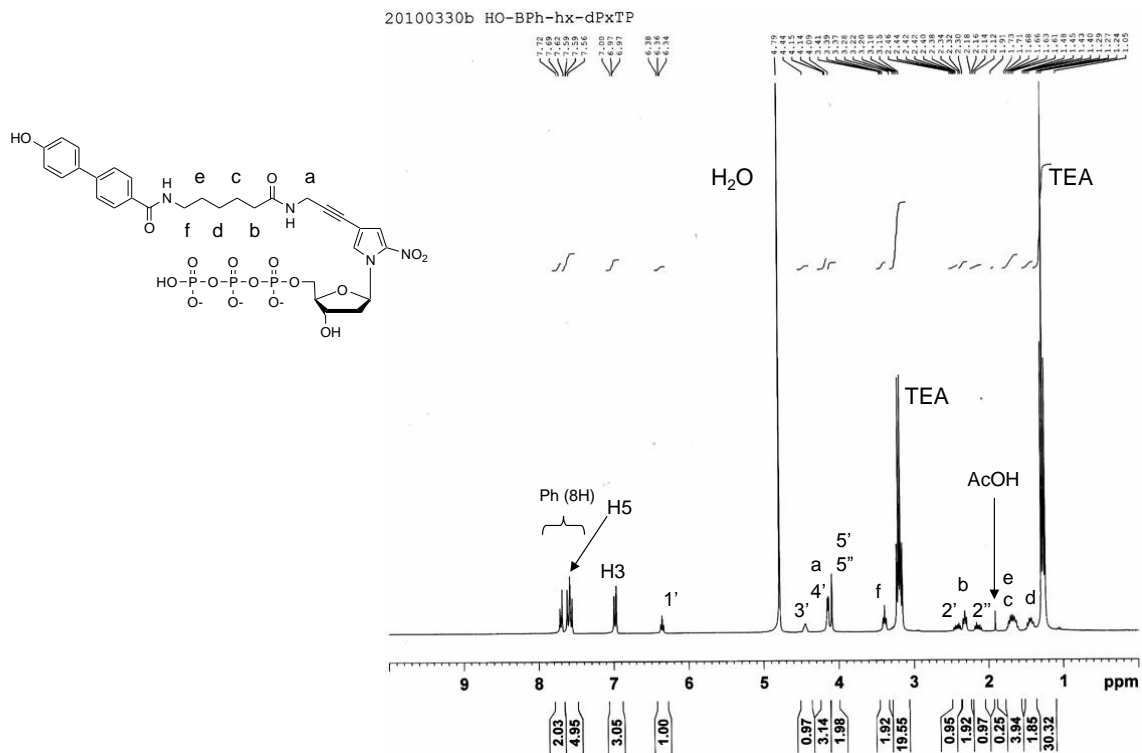

F24. ESI-MS spectrum of HBP-hx-dP $\alpha$ TP.

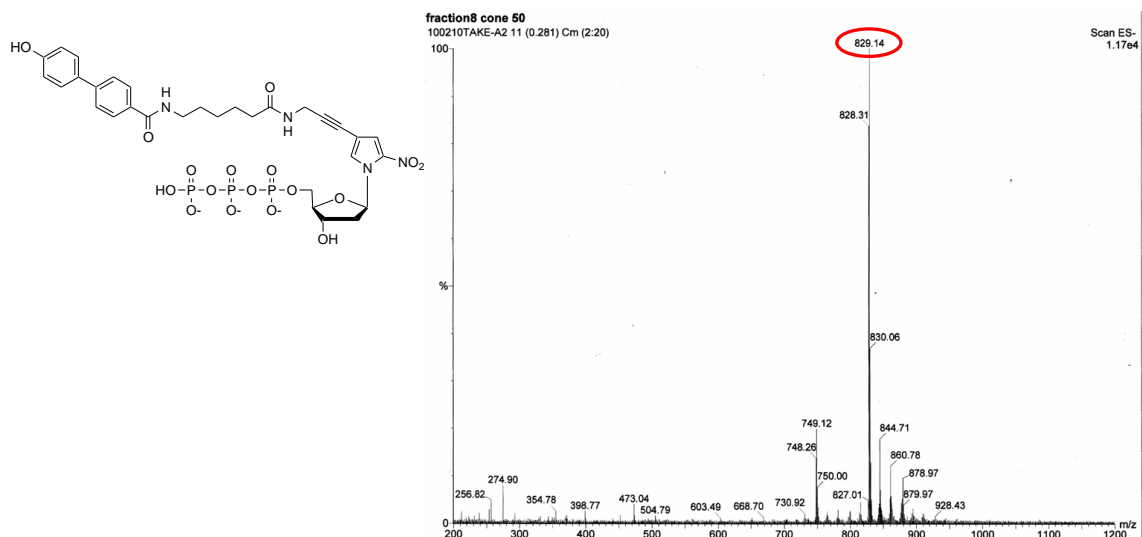

Supplement: supp_gkr1068_nar-02458-f-2011-File003.pdf [file supp_gkr1068_nar-02458-f-2011-File003.pdf]
